# Supplementary material
Source: ML conference proceedings conference paper supplement (https://www.ecva.net/papers/eccv_2020/papers_ECCV/html/123580443_ECCV_2020_paper.php)

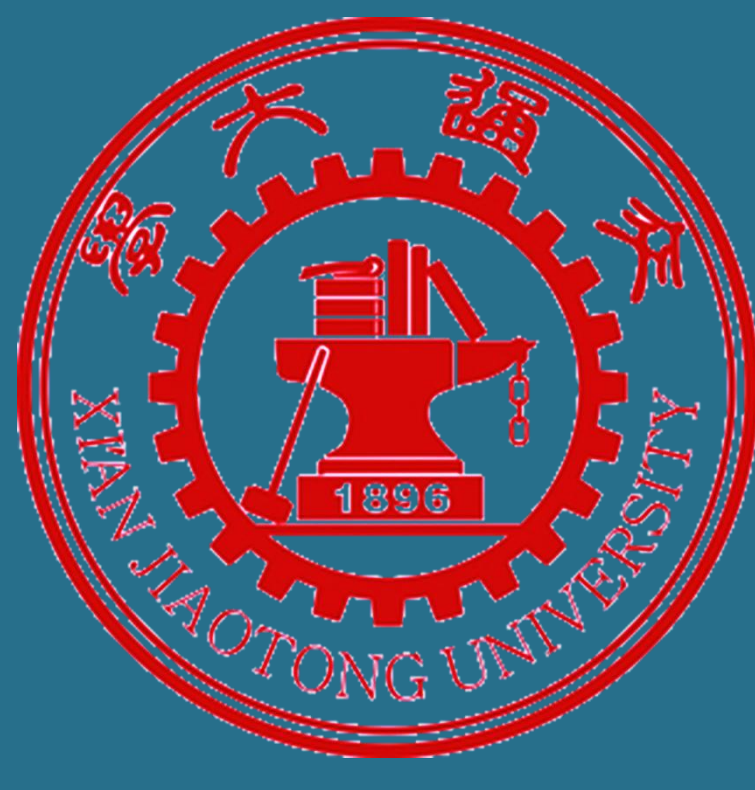

# Variational Denoising Networks: Toward Blind Noise Modeling and Removal (NeurIPS 2019)

Zongsheng Yue<sup>1</sup>; Hongwei Yong<sup>2</sup>; Qian Zhao<sup>1</sup>; Lei Zhang<sup>2</sup>; Deyu Meng<sup>1</sup>

<sup>1</sup>Xi'an Jiaotong University, <sup>2</sup>The Hong Kong Polytechnic University

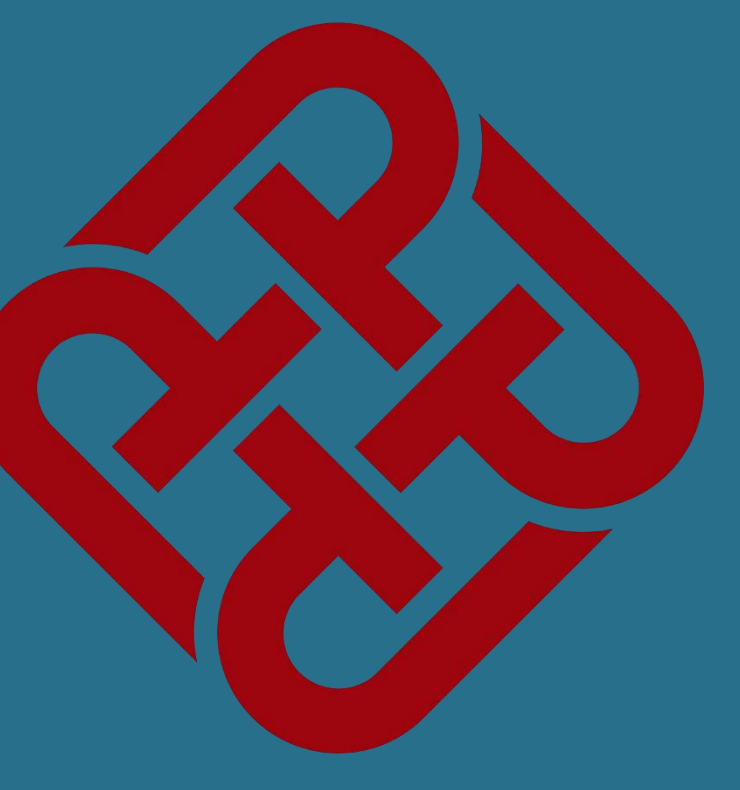

## Contribution

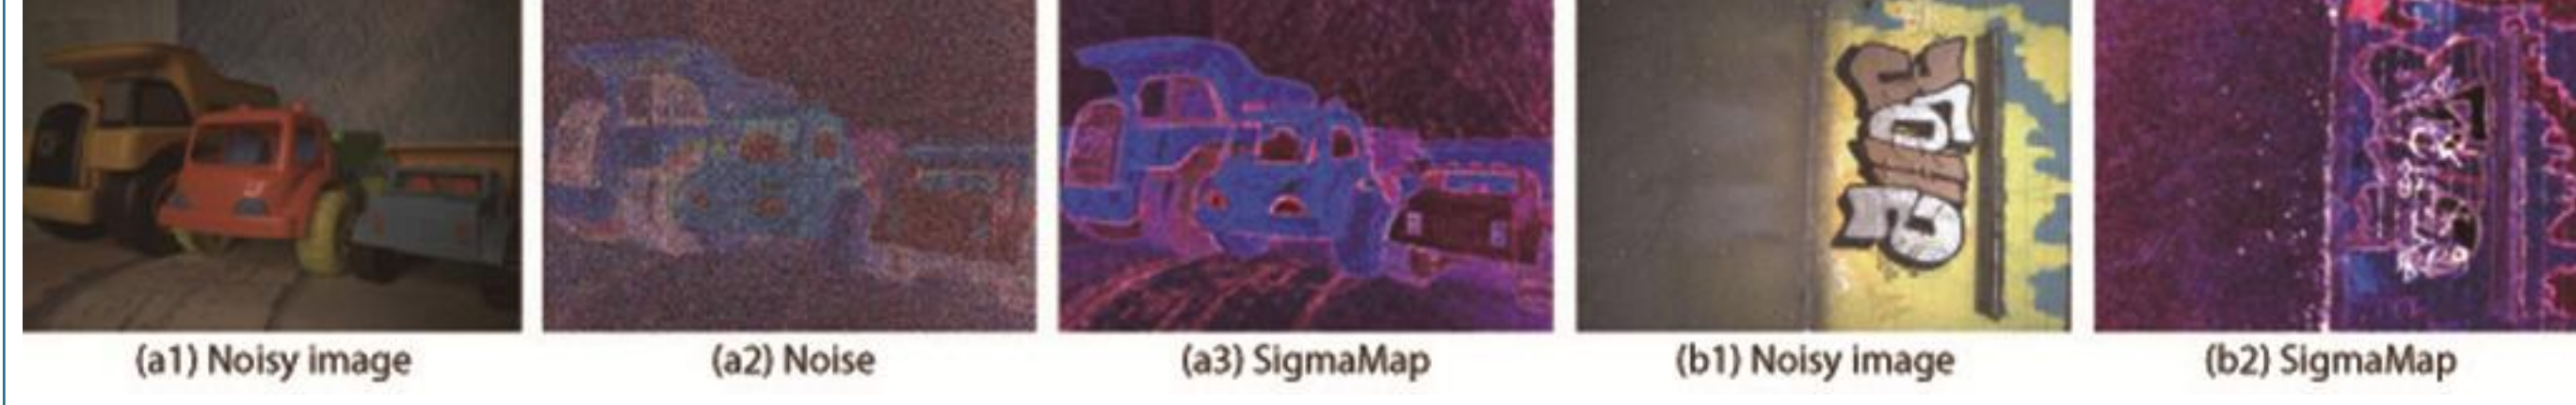

Figure 1: The noise variance map predicted by our proposed VDN on SIDD and DN benchmarks. (a1)-(a3): The noisy image, real noise ( $|y - x|$ ) and noise variance map of one typical image of SIDD validation dataset. (b1-b2): The noisy image and predicted noise variance map of one typical DND image.

- Our method is capable of simultaneously implementing both noise estimation and blind image denoising in a unique Bayesian framework.
- The noise distribution is modeled as a general non-i.i.d. configurations with spatial relevance across the image, which evidently better complies with the heterogeneous real noise beyond the conventional i.i.d. assumption.
- In special case, our method can degenerate as MSE loss generally used in traditional deep learning methods, which provides a new understanding to explain why they incline to overfit noise bias in training data.

## Full Bayesian Model

Training set  $D = \{y_j, x_j\}_{j=1}^n$ ,  $y_j$ : Noisy image,  $x_j$ : Simulated clean image.

For any  $\{y, x\} \in D$ , we assumed the following generation process:

$$y_i \sim N(y_i | z_i, \sigma_i^2), i = 1, 2, \dots, d$$

Conjugate prior for  $z$ :

$$z_i \sim N(z_i | x_i, \varepsilon_0^2), i = 1, 2, \dots, d$$

Conjugate prior for  $\sigma$ :

$$\sigma_i^2 \sim IG\left(\sigma_i^2 \middle| \frac{p^2}{2} - 1, \frac{p^2 \xi_i}{2}\right), i = 1, 2, \dots, d$$

Where  $\xi = \mathcal{G}((y - x)^2; p)$ .

Goal (Posterior Inference):

$$p(z, \sigma^2 | y) \xleftarrow{\text{approximate}} q(z, \sigma^2 | y)$$

Likelihood decomposition:

$$\log p(y; z, \sigma^2) = \underbrace{\mathcal{L}(z, \sigma^2; y)}_{\text{Variational Lower Bound}} + \underbrace{D_{KL}(q(z, \sigma^2 | y) || p(z, \sigma^2 | y))}_{\text{Non-negative}}$$

$$\log p(y; z, \sigma^2) \geq \mathcal{L}(z, \sigma^2; y)$$

Objective Function:

$$\max \mathcal{L}(z, \sigma^2; y)$$

## Variational Optimization

Conditional independence assumption:

$$q(z, \sigma^2 | y) = q(z | y) q(\sigma^2 | y)$$

Variational posterior form:

$$q(z | y) = \prod_i N(z_i | \mu_i, m_i^2), q(\sigma^2 | y) = \prod_i IG(\sigma_i^2 | \alpha_i, \beta_i)$$

Analytical lower bound:

$$\mathcal{L}(z, \sigma^2; y) = E_{q(z, \sigma^2 | y)} [\log p(y | z, \sigma^2)] - D_{KL}(q(z | y) || p(z)) - D_{KL}(q(\sigma^2 | y) || p(\sigma^2))$$

where

$$E_{q(z, \sigma^2 | y)} [\log p(y | z, \sigma^2)] = \sum_i \left\{ -\frac{1}{2} (\log \beta_i - \psi(\alpha_i)) - \frac{1}{2} \frac{\alpha_i}{\beta_i} [(y_i - \mu_i)^2 + m_i^2] \right\}$$

$$D_{KL}(q(z | y) || p(z)) = \sum_i \left\{ \underbrace{\frac{(\mu_i - x_i)^2}{2\varepsilon_0^2}}_{\text{MSE}} + \frac{1}{2} \left[ \underbrace{\frac{m_i^2}{\varepsilon_0^2}}_{E[\log \sigma_i^2]} - \log \frac{m_i^2}{\varepsilon_0^2} - 1 \right] \right\}$$

$$D_{KL}(q(\sigma^2 | y) || p(\sigma^2)) = \sum_i (\alpha_i - \alpha_i^0) \psi(\alpha_i) + [\log \Gamma(\alpha_i^0) - \log \Gamma(\alpha_i)] + \alpha_i^0 (\log \beta_i - \log \beta_i^0) + \alpha_i \left( \frac{\beta_i^0}{\beta_i} - 1 \right)$$

## Network Learning

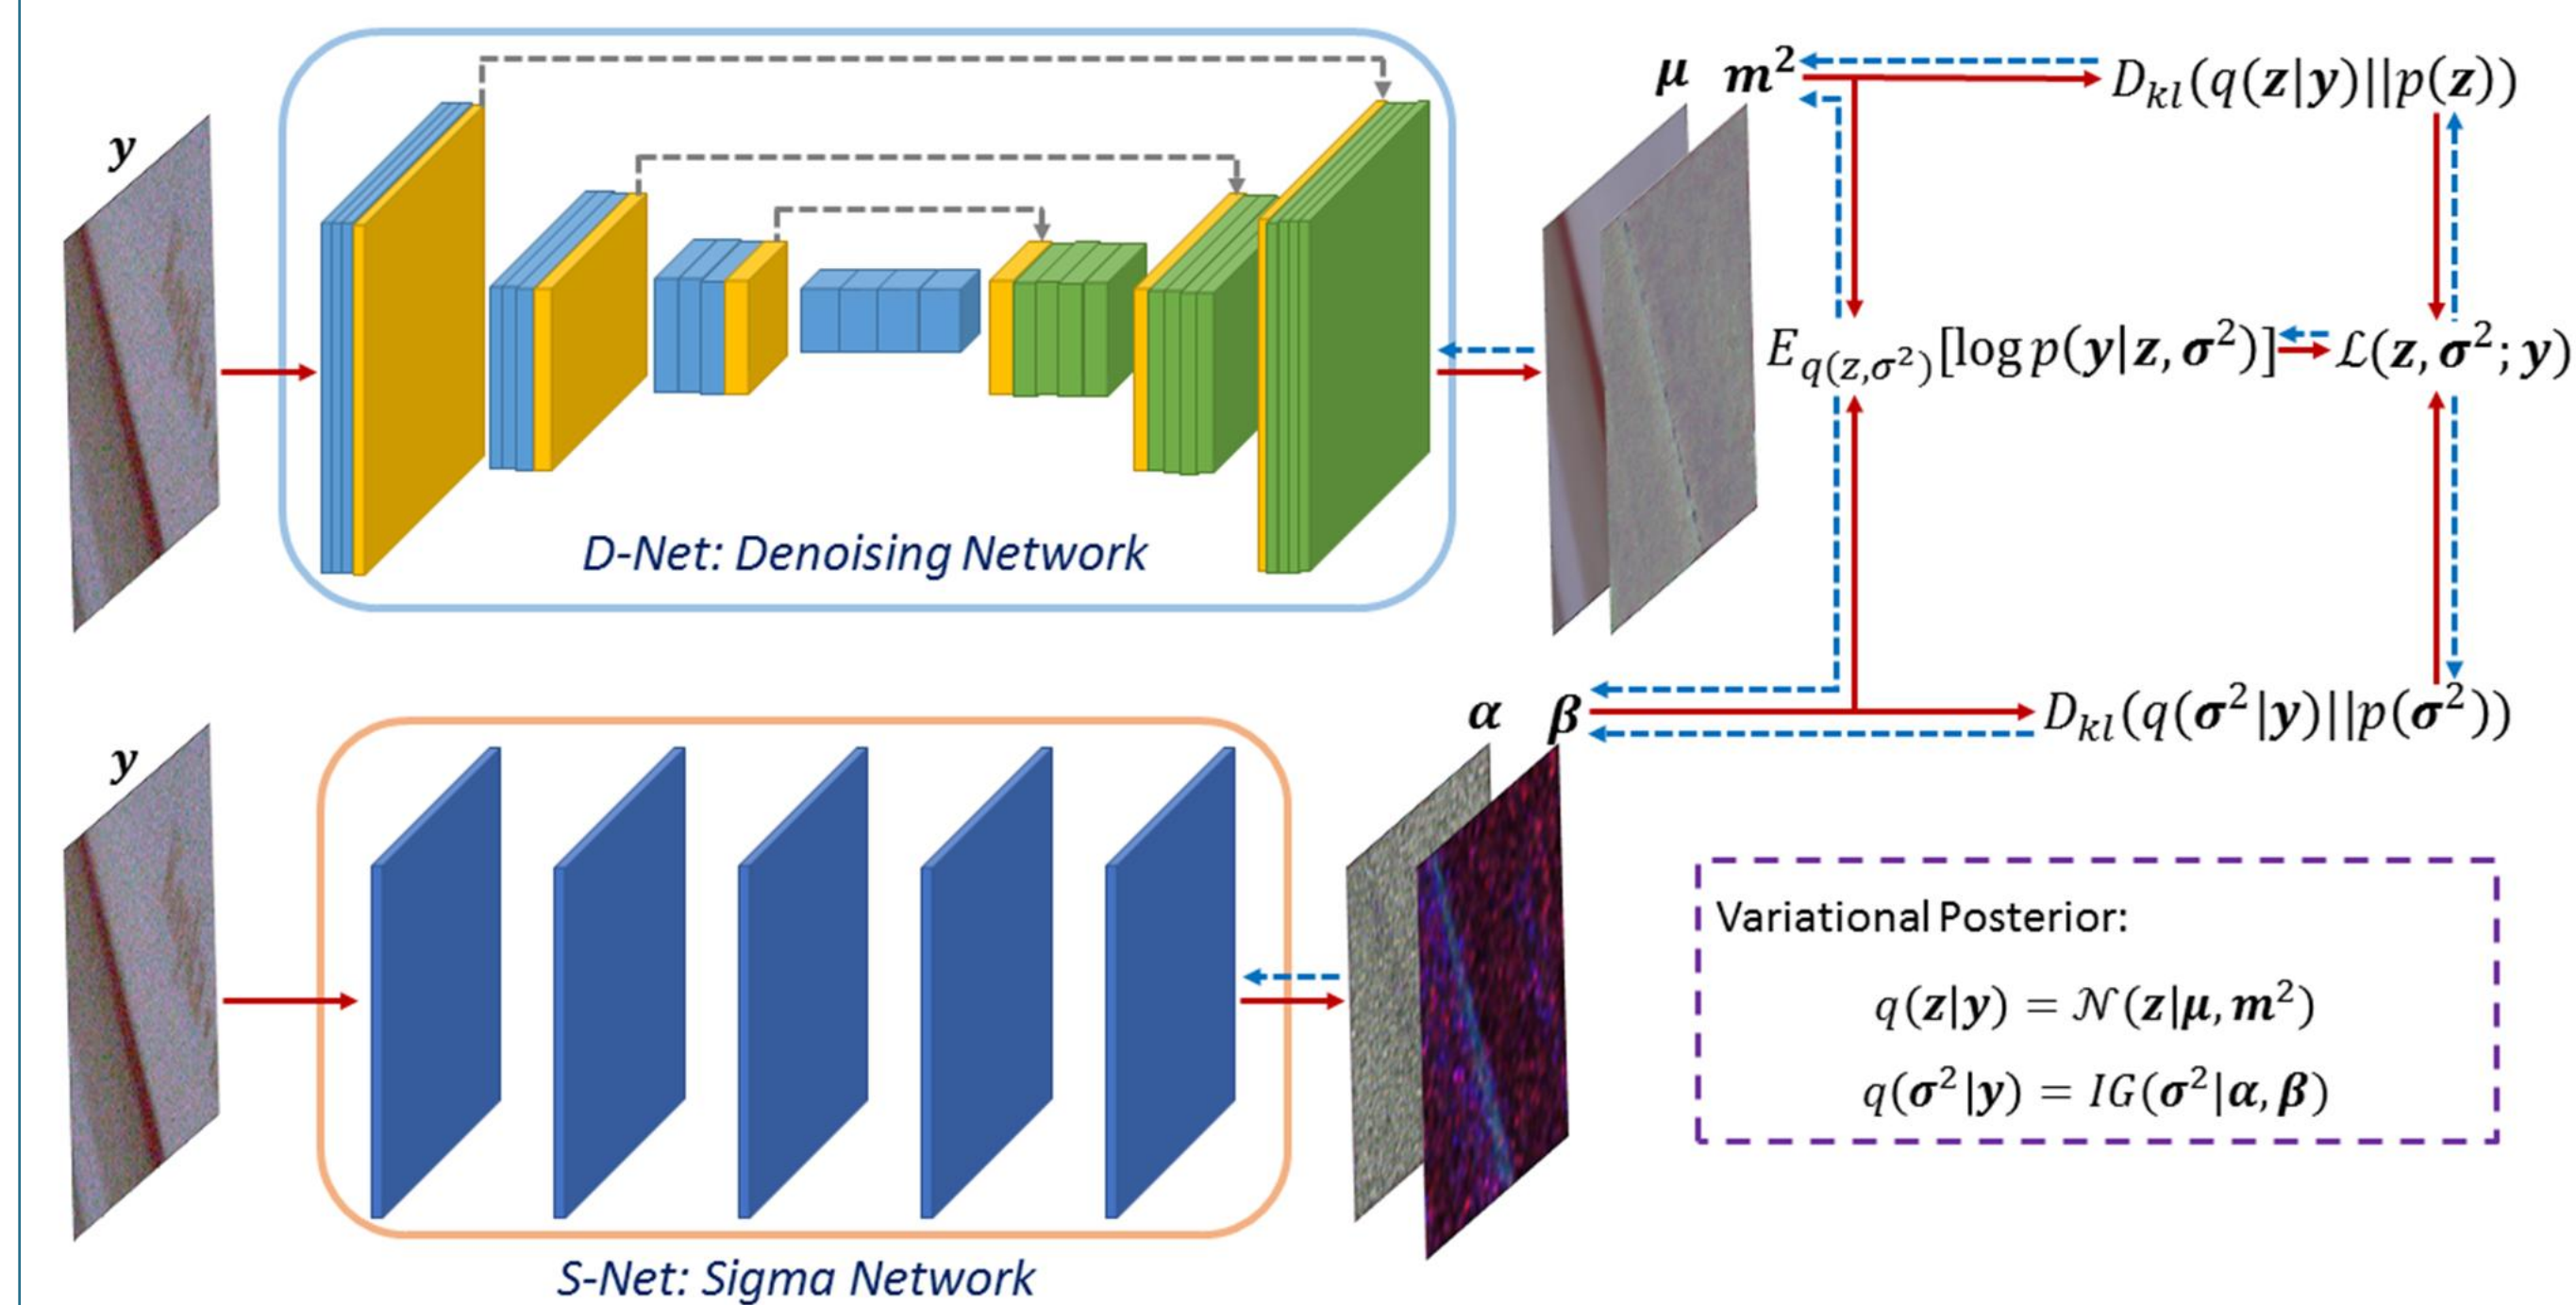

Figure 2: The architecture of the proposed deep variational inference network. The red solid lines denote the forward process, and the blue dotted lines mark the gradient flow direction in the BD algorithm.

It should be noted that our proposed method is a general framework, most of the commonly used network architecture in image restoration can also be easily substituted.

## Non-IID Gaussian Denoising

Noise generation:  $n = n^1 \odot M, n_{ij}^1 \sim N(n_{ij}^1 | 0, 1)$

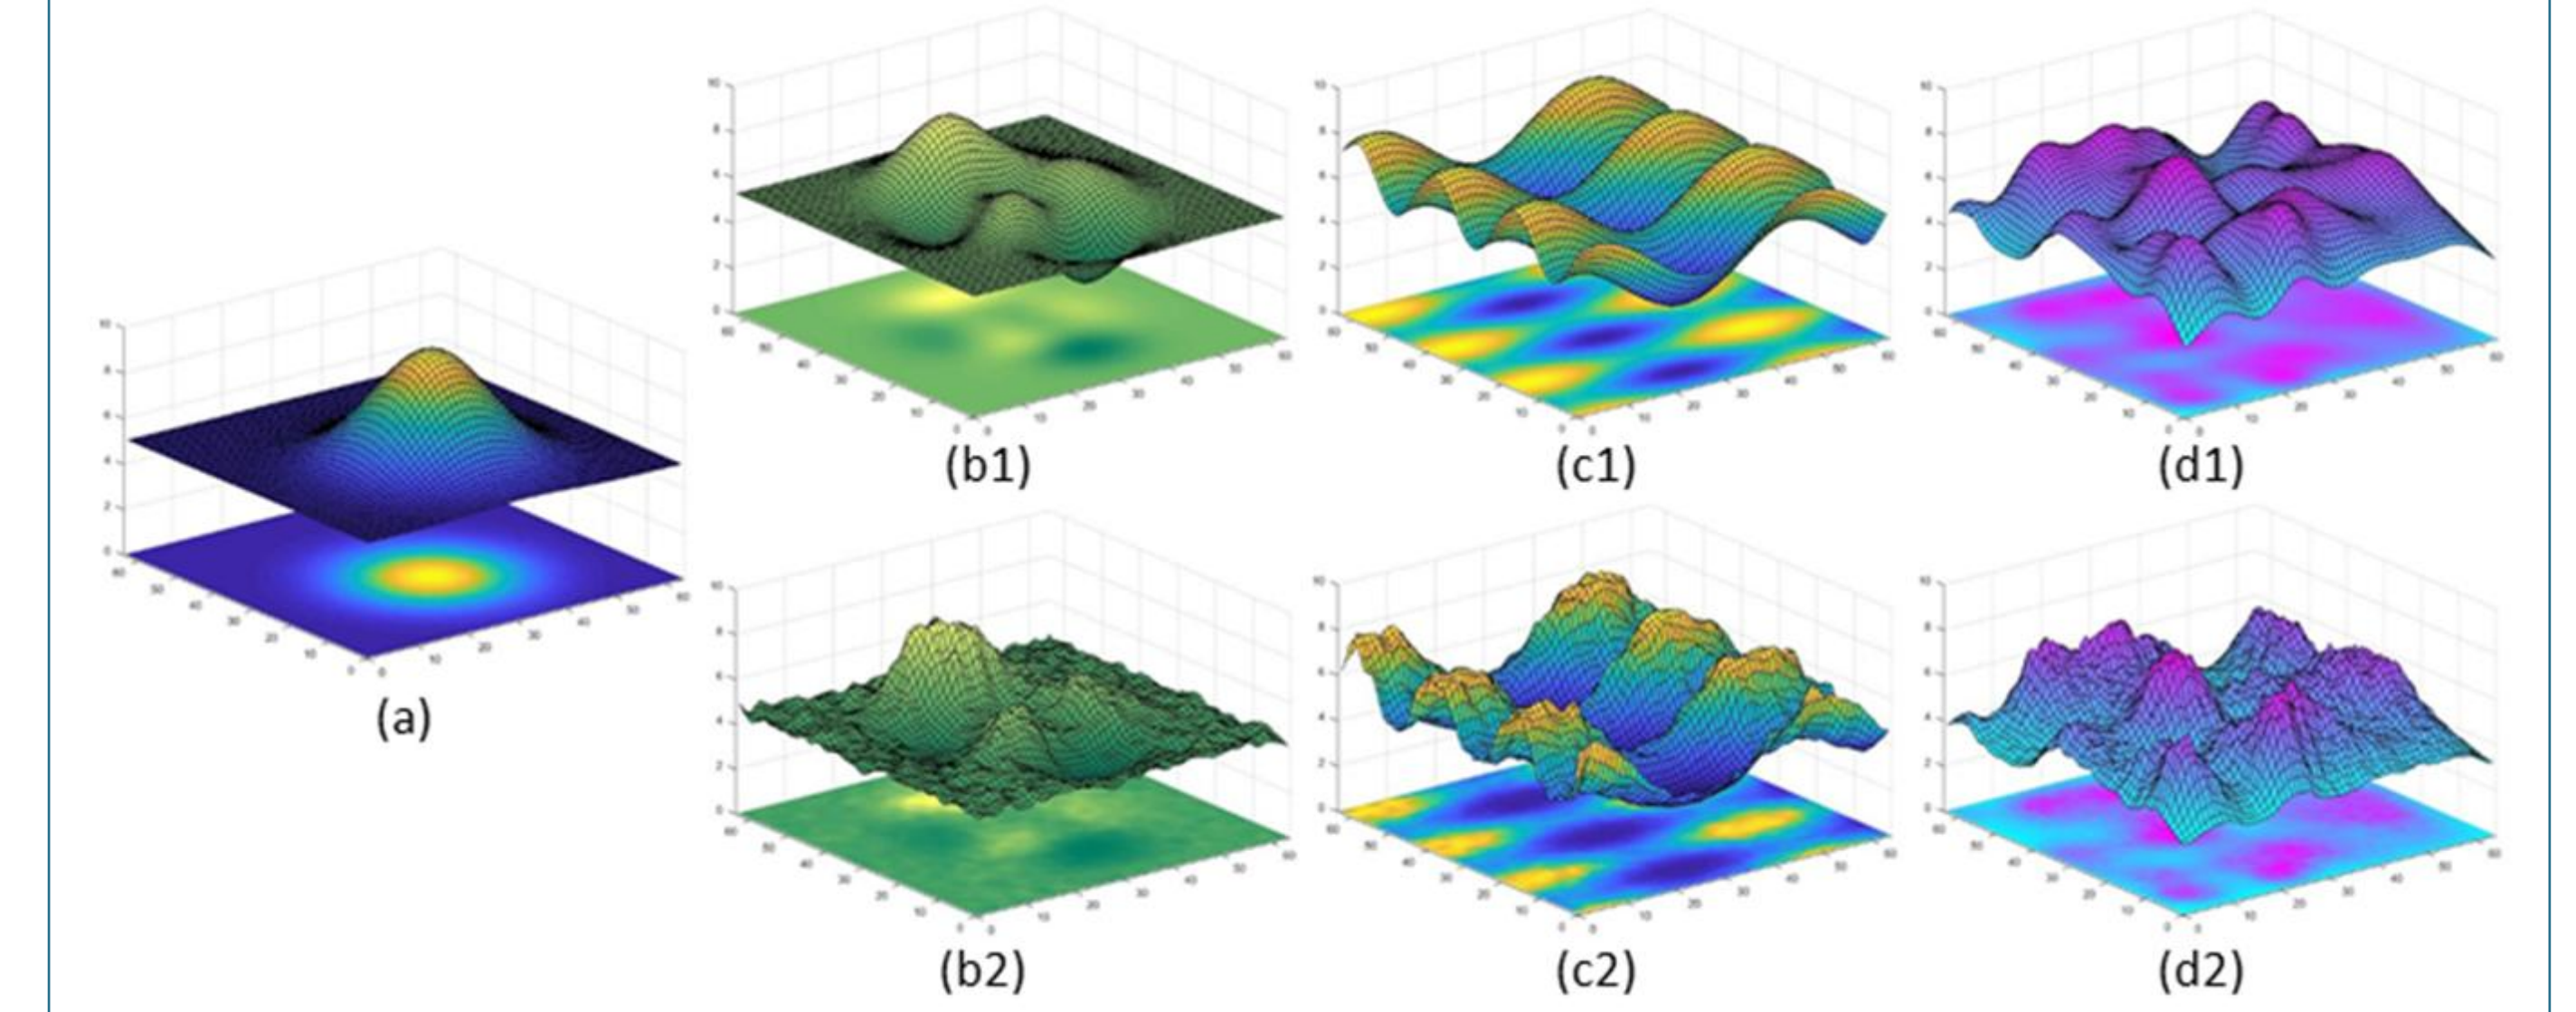

Figure 3: (a) The variance map  $M$  for noise generation in training data. (b1)-(d1): Three different  $M$ s on the testing data in Case 1-3. (b2)-(d2): Corresponding predicted  $M$ s by our method on the testing data.

Table 1: The PSNR results of all competing methods on the three groups of test datasets.

| Cases  | Datasets | Methods |       |       |       |       |        |        |       |
|--------|----------|---------|-------|-------|-------|-------|--------|--------|-------|
|        |          | CBM3D   | WNNM  | NCSR  | MLP   | DnCNN | FFDNet | FFDNet | UDNet |
| Case 1 | Set5     | 27.76   | 26.53 | 26.62 | 27.26 | 29.87 | 30.16  | 30.15  | 28.13 |
|        | LIVE1    | 26.58   | 25.27 | 24.96 | 25.71 | 28.81 | 28.99  | 28.96  | 27.19 |
|        | BSD68    | 26.51   | 25.13 | 24.96 | 25.58 | 28.72 | 28.78  | 28.77  | 27.13 |
| Case 2 | Set5     | 26.34   | 24.61 | 25.76 | 25.73 | 29.05 | 29.60  | 29.56  | 26.01 |
|        | LIVE1    | 25.18   | 23.52 | 24.08 | 24.31 | 28.18 | 28.58  | 28.56  | 25.25 |
|        | BSD68    | 25.28   | 23.52 | 24.27 | 24.30 | 28.14 | 28.43  | 28.42  | 25.13 |
| Case 3 | Set5     | 27.88   | 26.07 | 26.84 | 26.88 | 29.17 | 29.54  | 29.49  | 27.54 |
|        | LIVE1    | 26.50   | 24.67 | 24.96 | 25.26 | 28.15 | 28.39  | 28.38  | 26.48 |
|        | BSD68    | 26.44   | 24.60 | 24.95 | 25.10 | 28.10 | 28.22  | 28.20  | 26.44 |

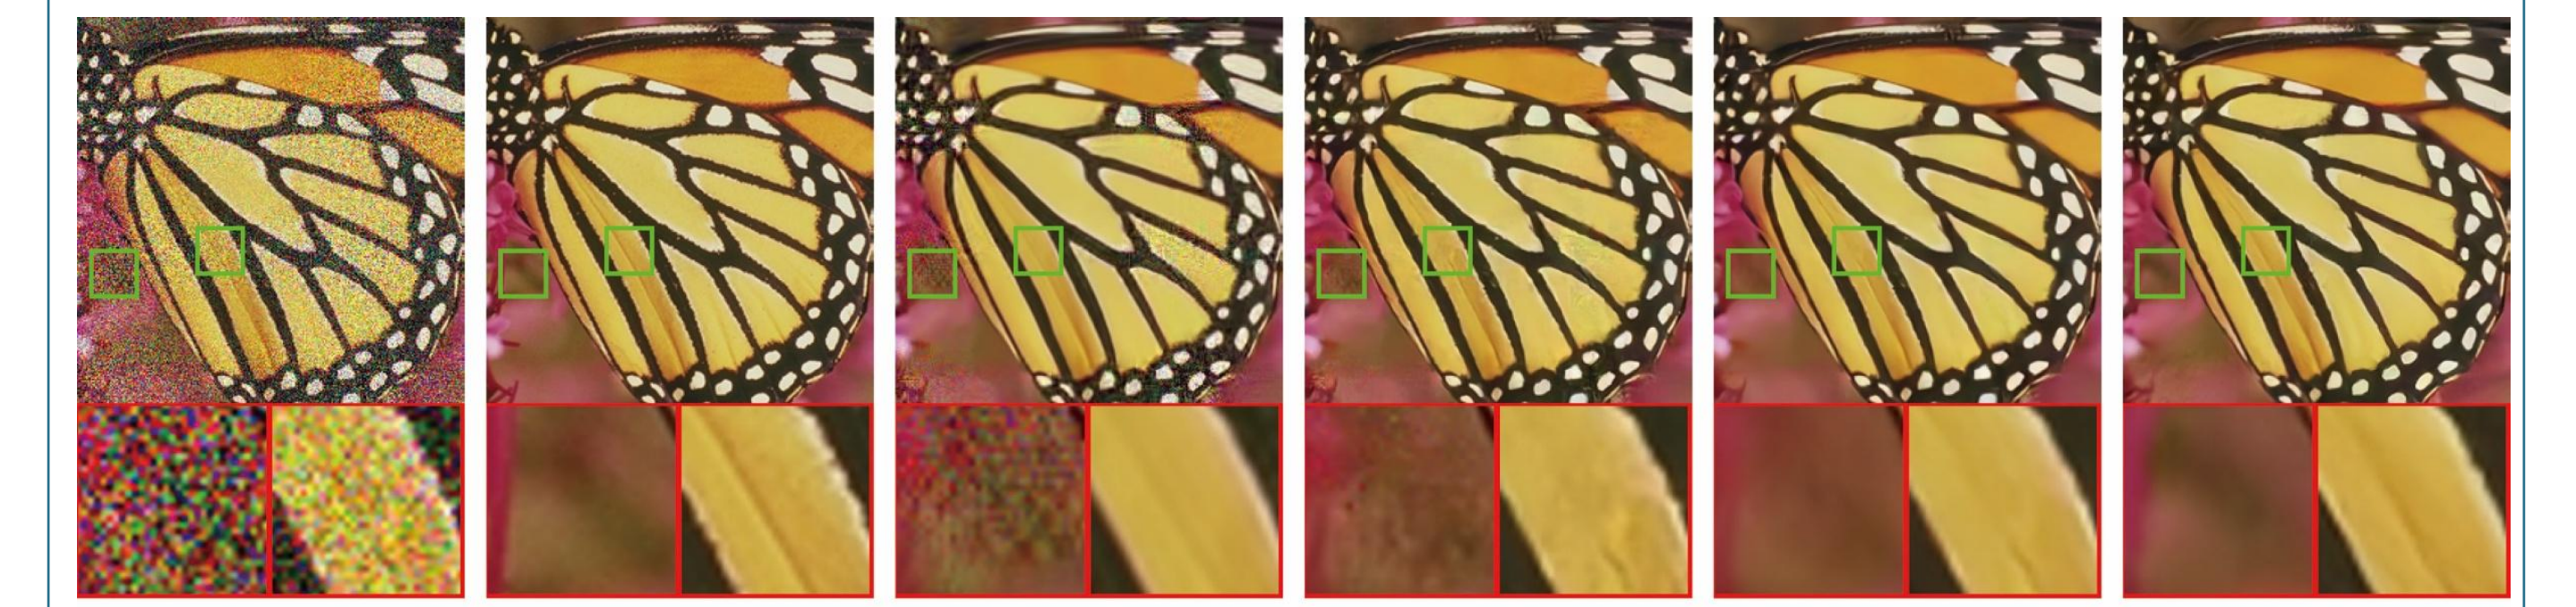

Figure 4: Image Denoising results of a typical test image in Case 2. (a) Noisy image, (b) Groundtruth, (c) CBM3D (24.63 Db), (d) DnCNN (27.83 dB), (e) FFDNet (28.06 dB), (f) VDN (28.32 dB).

## Real Benchmark Denoising

Table 2: The comparison results of different methods on SIDD Benchmark and Validation dataset.

| Datasets | SIDD Benchmark |       |       |       |       |              | SIDD Validation |       |              |
|----------|----------------|-------|-------|-------|-------|--------------|-----------------|-------|--------------|
|          | CBM3D          | WNNM  | MLP   | DnCNN | CBNet | VDN          | DnCNN           | CBNet | VDN          |
| PSNR     | 25.65          | 25.78 | 24.71 | 23.66 | 33.28 | <b>39.23</b> | 38.41           | 38.68 | <b>39.28</b> |
| SSIM     | 0.685          | 0.809 | 0.641 | 0.583 | 0.868 | <b>0.971</b> | <b>0.909</b>    | 0.901 | <b>0.909</b> |

Table 3: The comparison results of different methods DND Benchmark.

| Methods | CBM3D  | WNNM   | NCSR   | MLP    | DnCNN  | FFDNet | CBNet  | VDN           |
|---------|--------|--------|--------|--------|--------|--------|--------|---------------|
| PSNR    | 34.51  | 34.67  | 34.05  | 34.23  | 37.90  | 37.61  | 38.06  | <b>39.38</b>  |
| SSIM    | 0.8507 | 0.8646 | 0.8351 | 0.8331 | 0.9430 | 0.9415 | 0.9421 | <b>0.9518</b> |

Table 4: Hyper-parameters ( $\varepsilon_0^2$  and  $p$ ) analysis on the SIDD validation dataset.

| $\varepsilon_0^2$ | 1e-4   | 1e-5   | 1e-6          | 1e-7   | 1e-8   | MSE    | $p$  | 5             | 7            | 11     | 15     | 19     |
|-------------------|--------|--------|---------------|--------|--------|--------|------|---------------|--------------|--------|--------|--------|
| PSNR              | 38.89  | 39.20  | <b>39.28</b>  | 39.05  | 39.03  | 39.01  | PSNR | 39.26         | <b>39.28</b> | 39.26  | 39.24  | 39.24  |
| SSIM              | 0.9046 | 0.9079 | <b>0.9086</b> | 0.9064 | 0.9063 | 0.9061 | SSIM | <b>0.9089</b> | 0.9086       | 0.9086 | 0.9079 | 0.9079 |

## Contact

[name] Zongsheng Yue  
[organization] Xi'an Jiaotong University  
[address] Xi'an, Shaanxi province, China  
[email] zsy20110806207@stu.xjtu.edu.cn; zsyam@gmail.com;

## Source Code

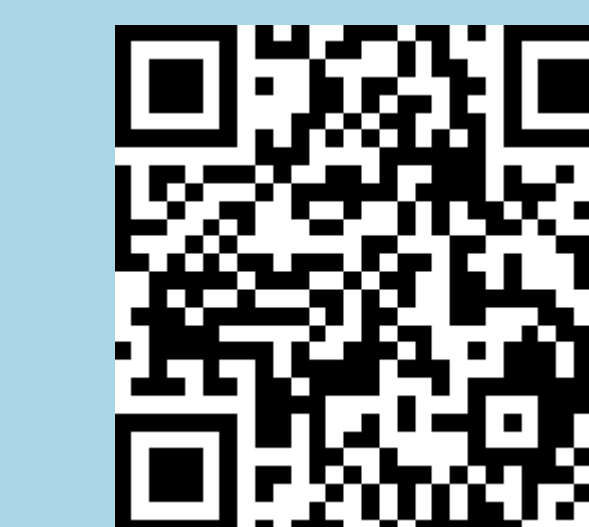

Supplement: Supplementary file 2 [file 123580443-supp.zip]
