# Supplementary material
Source: ML conference proceedings conference paper supplement (https://www.ecva.net/papers/eccv_2020/papers_ECCV/html/123580443_ECCV_2020_paper.php)
Supplement: Supplementary file 3 [file 123580443-supp.zip]

Archive with 175 entries (134 files):
- ECCV_2020_Supplementary/
- ECCV_2020_Supplementary/proposed/
- ECCV_2020_Supplementary/proposed/deblurring/
- ECCV_2020_Supplementary/proposed/deblurring/checkpoints/
- ECCV_2020_Supplementary/proposed/deblurring/checkpoints/DMPHN/
- ECCV_2020_Supplementary/proposed/deblurring/checkpoints/DMPHN_1_2_4/
- ECCV_2020_Supplementary/proposed/deblurring/checkpoints/SDNet2/
- ECCV_2020_Supplementary/proposed/deblurring/checkpoints/SDNet3/
- ECCV_2020_Supplementary/proposed/deblurring/checkpoints/SDNet4/
- ECCV_2020_Supplementary/proposed/deblurring/datasets.py
- ECCV_2020_Supplementary/proposed/deblurring/DMPHN_train.py
- ECCV_2020_Supplementary/proposed/deblurring/HQS_DMPHN_124.ipynb
- ECCV_2020_Supplementary/proposed/deblurring/HQS_DMPHN_deblurring_Stack4_124.ipynb
- ECCV_2020_Supplementary/proposed/deblurring/HQS_Stack2.ipynb
- ECCV_2020_Supplementary/proposed/deblurring/HQS_Stack3.ipynb
- ECCV_2020_Supplementary/proposed/deblurring/models.py
- ECCV_2020_Supplementary/proposed/denoising/
- ECCV_2020_Supplementary/proposed/denoising/framework/
- ECCV_2020_Supplementary/proposed/denoising/framework/checkpoints/
- ECCV_2020_Supplementary/proposed/denoising/framework/checkpoints/dncnn_s15.pth
- ECCV_2020_Supplementary/proposed/denoising/framework/checkpoints/dncnn_s25.pth
- ECCV_2020_Supplementary/proposed/denoising/framework/checkpoints/dncnn_s50.pth
- ECCV_2020_Supplementary/proposed/denoising/framework/checkpoints/model_state_niidgauss
- ECCV_2020_Supplementary/proposed/denoising/framework/checkpoints/n2n-gaussian.pt
- ECCV_2020_Supplementary/proposed/denoising/framework/data/
- ECCV_2020_Supplementary/proposed/denoising/framework/data/BSD68/
- ECCV_2020_Supplementary/proposed/denoising/framework/data/BSD68/test001.png
- ECCV_2020_Supplementary/proposed/denoising/framework/data/BSD68/test002.png
- ECCV_2020_Supplementary/proposed/denoising/framework/data/BSD68/test003.png
- ECCV_2020_Supplementary/proposed/denoising/framework/data/BSD68/test004.png
- ECCV_2020_Supplementary/proposed/denoising/framework/data/BSD68/test005.png
- ECCV_2020_Supplementary/proposed/denoising/framework/data/BSD68/test006.png
- ECCV_2020_Supplementary/proposed/denoising/framework/data/BSD68/test007.png
- ECCV_2020_Supplementary/proposed/denoising/framework/data/BSD68/test008.png
- ECCV_2020_Supplementary/proposed/denoising/framework/data/BSD68/test009.png
- ECCV_2020_Supplementary/proposed/denoising/framework/data/BSD68/test010.png
- ECCV_2020_Supplementary/proposed/denoising/framework/data/BSD68/test011.png
- ECCV_2020_Supplementary/proposed/denoising/framework/data/BSD68/test012.png
- ECCV_2020_Supplementary/proposed/denoising/framework/data/BSD68/test013.png
- ECCV_2020_Supplementary/proposed/denoising/framework/data/BSD68/test014.png
- ECCV_2020_Supplementary/proposed/denoising/framework/data/BSD68/test015.png
- ECCV_2020_Supplementary/proposed/denoising/framework/data/BSD68/test016.png
- ECCV_2020_Supplementary/proposed/denoising/framework/data/BSD68/test017.png
- ECCV_2020_Supplementary/proposed/denoising/framework/data/BSD68/test018.png
- ECCV_2020_Supplementary/proposed/denoising/framework/data/BSD68/test019.png
- ECCV_2020_Supplementary/proposed/denoising/framework/data/BSD68/test020.png
- ECCV_2020_Supplementary/proposed/denoising/framework/data/BSD68/test021.png
- ECCV_2020_Supplementary/proposed/denoising/framework/data/BSD68/test022.png
- ECCV_2020_Supplementary/proposed/denoising/framework/data/BSD68/test023.png
- ECCV_2020_Supplementary/proposed/denoising/framework/data/BSD68/test024.png
- ECCV_2020_Supplementary/proposed/denoising/framework/data/BSD68/test025.png
- ECCV_2020_Supplementary/proposed/denoising/framework/data/BSD68/test026.png
- ECCV_2020_Supplementary/proposed/denoising/framework/data/BSD68/test027.png
- ECCV_2020_Supplementary/proposed/denoising/framework/data/BSD68/test028.png
- ECCV_2020_Supplementary/proposed/denoising/framework/data/BSD68/test029.png
- ECCV_2020_Supplementary/proposed/denoising/framework/data/BSD68/test030.png
- ECCV_2020_Supplementary/proposed/denoising/framework/data/BSD68/test031.png
- ECCV_2020_Supplementary/proposed/denoising/framework/data/BSD68/test032.png
- ECCV_2020_Supplementary/proposed/denoising/framework/data/BSD68/test033.png
- ECCV_2020_Supplementary/proposed/denoising/framework/data/BSD68/test034.png
- ECCV_2020_Supplementary/proposed/denoising/framework/data/BSD68/test035.png
- ECCV_2020_Supplementary/proposed/denoising/framework/data/BSD68/test036.png
- ECCV_2020_Supplementary/proposed/denoising/framework/data/BSD68/test037.png
- ECCV_2020_Supplementary/proposed/denoising/framework/data/BSD68/test038.png
- ECCV_2020_Supplementary/proposed/denoising/framework/data/BSD68/test039.png
- ECCV_2020_Supplementary/proposed/denoising/framework/data/BSD68/test040.png
- ECCV_2020_Supplementary/proposed/denoising/framework/data/BSD68/test041.png
- ECCV_2020_Supplementary/proposed/denoising/framework/data/BSD68/test042.png
- ECCV_2020_Supplementary/proposed/denoising/framework/data/BSD68/test043.png
- ECCV_2020_Supplementary/proposed/denoising/framework/data/BSD68/test044.png
- ECCV_2020_Supplementary/proposed/denoising/framework/data/BSD68/test045.png
- ECCV_2020_Supplementary/proposed/denoising/framework/data/BSD68/test046.png
- ECCV_2020_Supplementary/proposed/denoising/framework/data/BSD68/test047.png
- ECCV_2020_Supplementary/proposed/denoising/framework/data/BSD68/test048.png
- ECCV_2020_Supplementary/proposed/denoising/framework/data/BSD68/test049.png
- ECCV_2020_Supplementary/proposed/denoising/framework/data/BSD68/test050.png
- ECCV_2020_Supplementary/proposed/denoising/framework/data/BSD68/test051.png
- ECCV_2020_Supplementary/proposed/denoising/framework/data/BSD68/test052.png
- ECCV_2020_Supplementary/proposed/denoising/framework/data/BSD68/test053.png
- ECCV_2020_Supplementary/proposed/denoising/framework/data/BSD68/test054.png
- ECCV_2020_Supplementary/proposed/denoising/framework/data/BSD68/test055.png
- ECCV_2020_Supplementary/proposed/denoising/framework/data/BSD68/test056.png
- ECCV_2020_Supplementary/proposed/denoising/framework/data/BSD68/test057.png
- ECCV_2020_Supplementary/proposed/denoising/framework/data/BSD68/test058.png
- ECCV_2020_Supplementary/proposed/denoising/framework/data/BSD68/test059.png
- ECCV_2020_Supplementary/proposed/denoising/framework/data/BSD68/test060.png
- ECCV_2020_Supplementary/proposed/denoising/framework/data/BSD68/test061.png
- ECCV_2020_Supplementary/proposed/denoising/framework/data/BSD68/test062.png
- ECCV_2020_Supplementary/proposed/denoising/framework/data/BSD68/test063.png
- ECCV_2020_Supplementary/proposed/denoising/framework/data/BSD68/test064.png
- ECCV_2020_Supplementary/proposed/denoising/framework/data/BSD68/test065.png
- ECCV_2020_Supplementary/proposed/denoising/framework/data/BSD68/test066.png
- ECCV_2020_Supplementary/proposed/denoising/framework/data/BSD68/test067.png
- ECCV_2020_Supplementary/proposed/denoising/framework/data/BSD68/test068.png
- ECCV_2020_Supplementary/proposed/denoising/framework/data/Set12/
- ECCV_2020_Supplementary/proposed/denoising/framework/state_of_the_art_HQS_vdn-BSD68.ipynb
- ECCV_2020_Supplementary/proposed/denoising/framework/state_of_the_art_HQS_vdn_set12.ipynb
- ECCV_2020_Supplementary/proposed/denoising/framework/utils.py
- ECCV_2020_Supplementary/proposed/denoising/train/
- ECCV_2020_Supplementary/proposed/denoising/train/DnCNN_train/
- ECCV_2020_Supplementary/proposed/denoising/train/DnCNN_train/data/
- ECCV_2020_Supplementary/proposed/denoising/train/DnCNN_train/data/BSDS300/
- ECCV_2020_Supplementary/proposed/denoising/train/DnCNN_train/dataset.py
- ECCV_2020_Supplementary/proposed/denoising/train/DnCNN_train/logs/
- ECCV_2020_Supplementary/proposed/denoising/train/DnCNN_train/logs/DnCNN-B/
- ECCV_2020_Supplementary/proposed/denoising/train/DnCNN_train/logs/DnCNN-S-15/
- ECCV_2020_Supplementary/proposed/denoising/train/DnCNN_train/logs/DnCNN-S-25/
- ECCV_2020_Supplementary/proposed/denoising/train/DnCNN_train/logs/DnCNN-S-50/
- ECCV_2020_Supplementary/proposed/denoising/train/DnCNN_train/models.py
- ECCV_2020_Supplementary/proposed/denoising/train/DnCNN_train/train.py
- ECCV_2020_Supplementary/proposed/denoising/train/DnCNN_train/utils.py
- ECCV_2020_Supplementary/proposed/denoising/train/N2N_train/
- ECCV_2020_Supplementary/proposed/denoising/train/N2N_train/ckpts/
- ECCV_2020_Supplementary/proposed/denoising/train/N2N_train/data/
- ECCV_2020_Supplementary/proposed/denoising/train/N2N_train/data/coco_val2017/
- ECCV_2020_Supplementary/proposed/denoising/train/N2N_train/figures/
- ECCV_2020_Supplementary/proposed/denoising/train/N2N_train/ReadMe.md
- ECCV_2020_Supplementary/proposed/denoising/train/N2N_train/requirements.txt
- ECCV_2020_Supplementary/proposed/denoising/train/N2N_train/src/
- ECCV_2020_Supplementary/proposed/denoising/train/N2N_train/src/ceshi.py
- ECCV_2020_Supplementary/proposed/denoising/train/N2N_train/src/cluster/
- ECCV_2020_Supplementary/proposed/denoising/train/N2N_train/src/cluster/run_all.sh
- ECCV_2020_Supplementary/proposed/denoising/train/N2N_train/src/cluster/test_montecarlo.sh
- ECCV_2020_Supplementary/proposed/denoising/train/N2N_train/src/cluster/train_gaussian_clean.sh
- ECCV_2020_Supplementary/proposed/denoising/train/N2N_train/src/cluster/train_gaussian_noisy.sh
- ECCV_2020_Supplementary/proposed/denoising/train/N2N_train/src/cluster/train_montecarlo.sh
- ECCV_2020_Supplementary/proposed/denoising/train/N2N_train/src/cluster/train_text_clean.sh
- ECCV_2020_Supplementary/proposed/denoising/train/N2N_train/src/cluster/train_text_noisy.sh
- ECCV_2020_Supplementary/proposed/denoising/train/N2N_train/src/datasets.py
- ECCV_2020_Supplementary/proposed/denoising/train/N2N_train/src/examples/
- ECCV_2020_Supplementary/proposed/denoising/train/N2N_train/src/examples/render.sh
- ECCV_2020_Supplementary/proposed/denoising/train/N2N_train/src/examples/test.sh
- ECCV_2020_Supplementary/proposed/denoising/train/N2N_train/src/examples/train.sh
- ECCV_2020_Supplementary/proposed/denoising/train/N2N_train/src/noise2noise.py
- ECCV_2020_Supplementary/proposed/denoising/train/N2N_train/src/render.py
- ECCV_2020_Supplementary/proposed/denoising/train/N2N_train/src/test.py
- ECCV_2020_Supplementary/proposed/denoising/train/N2N_train/src/train.py
- ECCV_2020_Supplementary/proposed/denoising/train/N2N_train/src/unet.py
- ECCV_2020_Supplementary/proposed/denoising/train/N2N_train/src/utils.py
- ECCV_2020_Supplementary/proposed/denoising/train/N2N_train/src/__pycache__/
- ECCV_2020_Supplementary/proposed/denoising/train/N2N_train/src/__pycache__/datasets.cpython-36.pyc
- ECCV_2020_Supplementary/proposed/denoising/train/N2N_train/src/__pycache__/noise2noise.cpython-36.pyc
- ECCV_2020_Supplementary/proposed/denoising/train/N2N_train/src/__pycache__/unet.cpython-36.pyc
- ECCV_2020_Supplementary/proposed/denoising/train/N2N_train/src/__pycache__/utils.cpython-36.pyc
- ECCV_2020_Supplementary/proposed/denoising/train/VDNet/
- ECCV_2020_Supplementary/proposed/denoising/train/VDNet/datasets/
- ECCV_2020_Supplementary/proposed/denoising/train/VDNet/datasets/data_tools.py
- ECCV_2020_Supplementary/proposed/denoising/train/VDNet/datasets/DenoisingDatasets.py
- ECCV_2020_Supplementary/proposed/denoising/train/VDNet/datasets/prepare_data/
- ECCV_2020_Supplementary/proposed/denoising/train/VDNet/datasets/prepare_data/SIDD/
- ECCV_2020_Supplementary/proposed/denoising/train/VDNet/datasets/prepare_data/SIDD/big2small_test.py
- ECCV_2020_Supplementary/proposed/denoising/train/VDNet/datasets/prepare_data/SIDD/big2small_train.py
- ECCV_2020_Supplementary/proposed/denoising/train/VDNet/datasets/prepare_data/SIDD/download_sidd_all.py
- ECCV_2020_Supplementary/proposed/denoising/train/VDNet/datasets/prepare_data/simulation/
- ECCV_2020_Supplementary/proposed/denoising/train/VDNet/datasets/prepare_data/simulation/noise_generate_nips_niid.py
- ECCV_2020_Supplementary/proposed/denoising/train/VDNet/datasets/__init__.py
- ECCV_2020_Supplementary/proposed/denoising/train/VDNet/demo_test_benchmark.py
- ECCV_2020_Supplementary/proposed/denoising/train/VDNet/demo_test_simulation.py
- ECCV_2020_Supplementary/proposed/denoising/train/VDNet/environment.yml
- ECCV_2020_Supplementary/proposed/denoising/train/VDNet/loss.py
- ECCV_2020_Supplementary/proposed/denoising/train/VDNet/model_state/
- ECCV_2020_Supplementary/proposed/denoising/train/VDNet/networks/
- ECCV_2020_Supplementary/proposed/denoising/train/VDNet/networks/DnCNN.py
- ECCV_2020_Supplementary/proposed/denoising/train/VDNet/networks/SubBlocks.py
- ECCV_2020_Supplementary/proposed/denoising/train/VDNet/networks/UNet.py
- ECCV_2020_Supplementary/proposed/denoising/train/VDNet/networks/VDN.py
- ECCV_2020_Supplementary/proposed/denoising/train/VDNet/networks/__init__.py
- ECCV_2020_Supplementary/proposed/denoising/train/VDNet/options.py
- ECCV_2020_Supplementary/proposed/denoising/train/VDNet/poster/
- ECCV_2020_Supplementary/proposed/denoising/train/VDNet/poster/nips_poster.pdf
- ECCV_2020_Supplementary/proposed/denoising/train/VDNet/train_benchmark.py
- ECCV_2020_Supplementary/proposed/denoising/train/VDNet/train_simulation.py
- ECCV_2020_Supplementary/proposed/denoising/train/VDNet/utils.py
- ECCV_2020_Supplementary/README.md
- ECCV_2020_Supplementary/Supplementary material.pdf
