# Supplementary material
Source: ML conference proceedings conference paper supplement (https://www.ecva.net/papers/eccv_2020/papers_ECCV/html/123580443_ECCV_2020_paper.php)
Supplement: Supplementary file 3 [file 123580443-supp.zip › ECCV_2020_Supplementary/proposed/deblurring/DMPHN_train.py]

import torch
import torch.nn as nn
import torch.nn.functional as F
from torch.autograd import Variable
from torch.optim.lr_scheduler import StepLR
import numpy as np
import os
import math
import argparse
import random
import models
import torchvision
from torch.utils.data import Dataset, DataLoader
from torchvision import transforms, datasets
from datasets import GoProDataset
import time

parser = argparse.ArgumentParser(description="Deep Multi-Patch Hierarchical Network")
parser.add_argument("-e","--epochs",type = int, default = 4000)
parser.add_argument("-se","--start_epoch",type = int, default = 0)
parser.add_argument("-b","--batchsize",type = int, default = 2)
parser.add_argument("-s","--imagesize",type = int, default = 256)
parser.add_argument("-l","--learning_rate", type = float, default = 0.0001)
parser.add_argument("-g","--gpu",type=int, default=0)
args = parser.parse_args()

#Hyper Parameters
METHOD = "DMPHN"
LEARNING_RATE = args.learning_rate
EPOCHS = args.epochs
GPU = args.gpu
BATCH_SIZE = args.batchsize
IMAGE_SIZE = args.imagesize

def save_deblur_images(images, iteration, epoch):
    filename = './checkpoints/' + METHOD + "/epoch" + str(epoch) + "/" + "Iter_" + str(iteration) + "_deblur.png"
    torchvision.utils.save_image(images, filename)

def weight_init(m):
    classname = m.__class__.__name__
    if classname.find('Conv') != -1:
        n = m.kernel_size[0] * m.kernel_size[1] * m.out_channels
        m.weight.data.normal_(0.0, 0.5*math.sqrt(2. / n))
        if m.bias is not None:
            m.bias.data.zero_()
    elif classname.find('BatchNorm') != -1:
        m.weight.data.fill_(1)
        m.bias.data.zero_()
    elif classname.find('Linear') != -1:
        n = m.weight.size(1)
        m.weight.data.normal_(0, 0.01)
        m.bias.data = torch.ones(m.bias.data.size())

def main():
    print("init data folders")

    encoder_lv1 = models.Encoder()
    encoder_lv2 = models.Encoder()    
    encoder_lv3 = models.Encoder()
    encoder_lv4 = models.Encoder()

    decoder_lv1 = models.Decoder()
    decoder_lv2 = models.Decoder()    
    decoder_lv3 = models.Decoder()
    decoder_lv4 = models.Decoder()
    
    encoder_lv1.apply(weight_init).cuda(GPU)    
    encoder_lv2.apply(weight_init).cuda(GPU)
    encoder_lv3.apply(weight_init).cuda(GPU)
    encoder_lv4.apply(weight_init).cuda(GPU)

    decoder_lv1.apply(weight_init).cuda(GPU)    
    decoder_lv2.apply(weight_init).cuda(GPU)
    decoder_lv3.apply(weight_init).cuda(GPU)
    decoder_lv4.apply(weight_init).cuda(GPU)
    
    encoder_lv1_optim = torch.optim.Adam(encoder_lv1.parameters(),lr=LEARNING_RATE)
    encoder_lv1_scheduler = StepLR(encoder_lv1_optim,step_size=1000,gamma=0.1)
    encoder_lv2_optim = torch.optim.Adam(encoder_lv2.parameters(),lr=LEARNING_RATE)
    encoder_lv2_scheduler = StepLR(encoder_lv2_optim,step_size=1000,gamma=0.1)
    encoder_lv3_optim = torch.optim.Adam(encoder_lv3.parameters(),lr=LEARNING_RATE)
    encoder_lv3_scheduler = StepLR(encoder_lv3_optim,step_size=1000,gamma=0.1)
    encoder_lv4_optim = torch.optim.Adam(encoder_lv4.parameters(),lr=LEARNING_RATE)
    encoder_lv4_scheduler = StepLR(encoder_lv4_optim,step_size=1000,gamma=0.1)

    decoder_lv1_optim = torch.optim.Adam(decoder_lv1.parameters(),lr=LEARNING_RATE)
    decoder_lv1_scheduler = StepLR(decoder_lv1_optim,step_size=1000,gamma=0.1)
    decoder_lv2_optim = torch.optim.Adam(decoder_lv2.parameters(),lr=LEARNING_RATE)
    decoder_lv2_scheduler = StepLR(decoder_lv2_optim,step_size=1000,gamma=0.1)
    decoder_lv3_optim = torch.optim.Adam(decoder_lv3.parameters(),lr=LEARNING_RATE)
    decoder_lv3_scheduler = StepLR(decoder_lv3_optim,step_size=1000,gamma=0.1)
    decoder_lv4_optim = torch.optim.Adam(decoder_lv4.parameters(),lr=LEARNING_RATE)
    decoder_lv4_scheduler = StepLR(decoder_lv4_optim,step_size=1000,gamma=0.1)

    if os.path.exists(str('./checkpoints/' + METHOD + "/encoder_lv1.pkl")):
        encoder_lv1.load_state_dict(torch.load(str('./checkpoints/' + METHOD + "/encoder_lv1.pkl")))
        print("load encoder_lv1 success")
    if os.path.exists(str('./checkpoints/' + METHOD + "/encoder_lv2.pkl")):
        encoder_lv2.load_state_dict(torch.load(str('./checkpoints/' + METHOD + "/encoder_lv2.pkl")))
        print("load encoder_lv2 success")
    if os.path.exists(str('./checkpoints/' + METHOD + "/encoder_lv3.pkl")):
        encoder_lv3.load_state_dict(torch.load(str('./checkpoints/' + METHOD + "/encoder_lv3.pkl")))
        print("load encoder_lv3 success")
    if os.path.exists(str('./checkpoints/' + METHOD + "/encoder_lv4.pkl")):
        encoder_lv4.load_state_dict(torch.load(str('./checkpoints/' + METHOD + "/encoder_lv4.pkl")))
        print("load encoder_lv4 success")

    if os.path.exists(str('./checkpoints/' + METHOD + "/decoder_lv1.pkl")):
        decoder_lv1.load_state_dict(torch.load(str('./checkpoints/' + METHOD + "/decoder_lv1.pkl")))
        print("load encoder_lv1 success")
    if os.path.exists(str('./checkpoints/' + METHOD + "/decoder_lv2.pkl")):
        decoder_lv2.load_state_dict(torch.load(str('./checkpoints/' + METHOD + "/decoder_lv2.pkl")))
        print("load decoder_lv2 success")
    if os.path.exists(str('./checkpoints/' + METHOD + "/decoder_lv3.pkl")):
        decoder_lv3.load_state_dict(torch.load(str('./checkpoints/' + METHOD + "/decoder_lv3.pkl")))
        print("load decoder_lv3 success")
    if os.path.exists(str('./checkpoints/' + METHOD + "/decoder_lv4.pkl")):
        decoder_lv4.load_state_dict(torch.load(str('./checkpoints/' + METHOD + "/decoder_lv4.pkl")))
        print("load decoder_lv4 success")
    
    if os.path.exists('./checkpoints/' + METHOD) == False:
        os.system('mkdir ./checkpoints/' + METHOD)    
            
    for epoch in range(args.start_epoch, EPOCHS):
        encoder_lv1_scheduler.step(epoch)
        encoder_lv2_scheduler.step(epoch)
        encoder_lv3_scheduler.step(epoch)
        encoder_lv4_scheduler.step(epoch)

        decoder_lv1_scheduler.step(epoch)
        decoder_lv2_scheduler.step(epoch)
        decoder_lv3_scheduler.step(epoch)
        decoder_lv4_scheduler.step(epoch)      
        
        print("Training...")
        
        train_dataset = GoProDataset(
            blur_image_files = './datas/GoPro/train_blur_file.txt',
            sharp_image_files = './datas/GoPro/train_sharp_file.txt',
            root_dir = './datas/GoPro',
            crop = True,
            crop_size = IMAGE_SIZE,
            transform = transforms.Compose([
                transforms.ToTensor()
                ]))

        train_dataloader = DataLoader(train_dataset, batch_size = BATCH_SIZE, shuffle=True)
        start = 0
        
        for iteration, images in enumerate(train_dataloader):            
            mse = nn.MSELoss().cuda(GPU)            
            
            gt = Variable(images['sharp_image'] - 0.5).cuda(GPU)
            H = gt.size(2)          
            W = gt.size(3)
            
            images_lv1 = Variable(images['blur_image'] - 0.5).cuda(GPU)
            images_lv2_1 = images_lv1[:,:,0:int(H/2),:]
            images_lv2_2 = images_lv1[:,:,int(H/2):H,:]
            images_lv3_1 = images_lv2_1[:,:,:,0:int(W/2)]
            images_lv3_2 = images_lv2_1[:,:,:,int(W/2):W]
            images_lv3_3 = images_lv2_2[:,:,:,0:int(W/2)]
            images_lv3_4 = images_lv2_2[:,:,:,int(W/2):W]
            images_lv4_1 = images_lv3_1[:,:,0:int(H/4),:]
            images_lv4_2 = images_lv3_1[:,:,int(H/4):int(H/2),:]
            images_lv4_3 = images_lv3_2[:,:,0:int(H/4),:]
            images_lv4_4 = images_lv3_2[:,:,int(H/4):int(H/2),:]
            images_lv4_5 = images_lv3_3[:,:,0:int(H/4),:]
            images_lv4_6 = images_lv3_3[:,:,int(H/4):int(H/2),:]
            images_lv4_7 = images_lv3_4[:,:,0:int(H/4),:]
            images_lv4_8 = images_lv3_4[:,:,int(H/4):int(H/2),:]

            feature_lv4_1 = encoder_lv4(images_lv4_1)
            feature_lv4_2 = encoder_lv4(images_lv4_2)
            feature_lv4_3 = encoder_lv4(images_lv4_3)
            feature_lv4_4 = encoder_lv4(images_lv4_4)
            feature_lv4_5 = encoder_lv4(images_lv4_5)
            feature_lv4_6 = encoder_lv4(images_lv4_6)
            feature_lv4_7 = encoder_lv4(images_lv4_7)
            feature_lv4_8 = encoder_lv4(images_lv4_8)
            feature_lv4_top_left = torch.cat((feature_lv4_1, feature_lv4_2), 2)
            feature_lv4_top_right = torch.cat((feature_lv4_3, feature_lv4_4), 2)
            feature_lv4_bot_left = torch.cat((feature_lv4_5, feature_lv4_6), 2)
            feature_lv4_bot_right = torch.cat((feature_lv4_7, feature_lv4_8), 2)
            feature_lv4_top = torch.cat((feature_lv4_top_left, feature_lv4_top_right), 3)
            feature_lv4_bot = torch.cat((feature_lv4_bot_left, feature_lv4_bot_right), 3)
            feature_lv4 = torch.cat((feature_lv4_top, feature_lv4_bot), 2)
            residual_lv4_top_left = decoder_lv4(feature_lv4_top_left)
            residual_lv4_top_right = decoder_lv4(feature_lv4_top_right)
            residual_lv4_bot_left = decoder_lv4(feature_lv4_bot_left)
            residual_lv4_bot_right = decoder_lv4(feature_lv4_bot_right)

            feature_lv3_1 = encoder_lv3(images_lv3_1 + residual_lv4_top_left)
            feature_lv3_2 = encoder_lv3(images_lv3_2 + residual_lv4_top_right)
            feature_lv3_3 = encoder_lv3(images_lv3_3 + residual_lv4_bot_left)
            feature_lv3_4 = encoder_lv3(images_lv3_4 + residual_lv4_bot_right)
            feature_lv3_top = torch.cat((feature_lv3_1, feature_lv3_2), 3) + feature_lv4_top
            feature_lv3_bot = torch.cat((feature_lv3_3, feature_lv3_4), 3) + feature_lv4_bot
            feature_lv3 = torch.cat((feature_lv3_top, feature_lv3_bot), 2)
            residual_lv3_top = decoder_lv3(feature_lv3_top)
            residual_lv3_bot = decoder_lv3(feature_lv3_bot)

            feature_lv2_1 = encoder_lv2(images_lv2_1 + residual_lv3_top)
            feature_lv2_2 = encoder_lv2(images_lv2_2 + residual_lv3_bot)
            feature_lv2 = torch.cat((feature_lv2_1, feature_lv2_2), 2) + feature_lv3
            residual_lv2 = decoder_lv2(feature_lv2)

            feature_lv1 = encoder_lv1(images_lv1 + residual_lv2) + feature_lv2
            deblur_image = decoder_lv1(feature_lv1)

            loss = mse(deblur_image, gt)
            
            encoder_lv1.zero_grad()
            encoder_lv2.zero_grad()
            encoder_lv3.zero_grad()
            encoder_lv4.zero_grad()

            decoder_lv1.zero_grad()
            decoder_lv2.zero_grad()
            decoder_lv3.zero_grad()
            decoder_lv4.zero_grad()
            
            loss.backward()

            encoder_lv1_optim.step()
            encoder_lv2_optim.step()
            encoder_lv3_optim.step()
            encoder_lv4_optim.step()

            decoder_lv1_optim.step()
            decoder_lv2_optim.step()
            decoder_lv3_optim.step()
            decoder_lv4_optim.step()
            
            if (iteration+1)%10 == 0:
                stop = time.time()
                print("epoch:", epoch, "iteration:", iteration+1, "loss:%.4f"%loss.item(), 'time:%.4f'%(stop-start))
                start = time.time()
                
        if (epoch)%100==0:
            if os.path.exists('./checkpoints/' + METHOD + '/epoch' + str(epoch)) == False:
            	os.system('mkdir ./checkpoints/' + METHOD + '/epoch' + str(epoch))
            
            print("Testing...")
            test_dataset = GoProDataset(
                blur_image_files = './datas/GoPro/test_blur_file.txt',
                sharp_image_files = './datas/GoPro/test_sharp_file.txt',
                root_dir = './datas/GoPro',
                transform = transforms.Compose([
                    transforms.ToTensor()
                ]))
            test_dataloader = DataLoader(test_dataset, batch_size = 1, shuffle=False)
            test_time = 0       
            for iteration, images in enumerate(test_dataloader):
                with torch.no_grad():
                    start = time.time()                 
                    images_lv1 = Variable(images['blur_image'] - 0.5).cuda(GPU)  
                    H = images_lv1.size(2)
                    W = images_lv1.size(3)          
                    images_lv2_1 = images_lv1[:,:,0:int(H/2),:]
                    images_lv2_2 = images_lv1[:,:,int(H/2):H,:]
                    images_lv3_1 = images_lv2_1[:,:,:,0:int(W/2)]
                    images_lv3_2 = images_lv2_1[:,:,:,int(W/2):W]
                    images_lv3_3 = images_lv2_2[:,:,:,0:int(W/2)]
                    images_lv3_4 = images_lv2_2[:,:,:,int(W/2):W]
                    images_lv4_1 = images_lv3_1[:,:,0:int(H/4),:]
                    images_lv4_2 = images_lv3_1[:,:,int(H/4):int(H/2),:]
                    images_lv4_3 = images_lv3_2[:,:,0:int(H/4),:]
                    images_lv4_4 = images_lv3_2[:,:,int(H/4):int(H/2),:]
                    images_lv4_5 = images_lv3_3[:,:,0:int(H/4),:]
                    images_lv4_6 = images_lv3_3[:,:,int(H/4):int(H/2),:]
                    images_lv4_7 = images_lv3_4[:,:,0:int(H/4),:]
                    images_lv4_8 = images_lv3_4[:,:,int(H/4):int(H/2),:]
                    
                    feature_lv4_1 = encoder_lv4(images_lv4_1)
                    feature_lv4_2 = encoder_lv4(images_lv4_2)
                    feature_lv4_3 = encoder_lv4(images_lv4_3)
                    feature_lv4_4 = encoder_lv4(images_lv4_4)
                    feature_lv4_5 = encoder_lv4(images_lv4_5)
                    feature_lv4_6 = encoder_lv4(images_lv4_6)
                    feature_lv4_7 = encoder_lv4(images_lv4_7)
                    feature_lv4_8 = encoder_lv4(images_lv4_8)
                    
                    feature_lv4_top_left = torch.cat((feature_lv4_1, feature_lv4_2), 2)
                    feature_lv4_top_right = torch.cat((feature_lv4_3, feature_lv4_4), 2)
                    feature_lv4_bot_left = torch.cat((feature_lv4_5, feature_lv4_6), 2)
                    feature_lv4_bot_right = torch.cat((feature_lv4_7, feature_lv4_8), 2)
                    
                    feature_lv4_top = torch.cat((feature_lv4_top_left, feature_lv4_top_right), 3)
                    feature_lv4_bot = torch.cat((feature_lv4_bot_left, feature_lv4_bot_right), 3)
                    
                    residual_lv4_top_left = decoder_lv4(feature_lv4_top_left)
                    residual_lv4_top_right = decoder_lv4(feature_lv4_top_right)
                    residual_lv4_bot_left = decoder_lv4(feature_lv4_bot_left)
                    residual_lv4_bot_right = decoder_lv4(feature_lv4_bot_right)
            
                    feature_lv3_1 = encoder_lv3(images_lv3_1 + residual_lv4_top_left)
                    feature_lv3_2 = encoder_lv3(images_lv3_2 + residual_lv4_top_right)
                    feature_lv3_3 = encoder_lv3(images_lv3_3 + residual_lv4_bot_left)
                    feature_lv3_4 = encoder_lv3(images_lv3_4 + residual_lv4_bot_right)
                    
                    feature_lv3_top = torch.cat((feature_lv3_1, feature_lv3_2), 3) + feature_lv4_top
                    feature_lv3_bot = torch.cat((feature_lv3_3, feature_lv3_4), 3) + feature_lv4_bot
                    residual_lv3_top = decoder_lv3(feature_lv3_top)
                    residual_lv3_bot = decoder_lv3(feature_lv3_bot)
                
                    feature_lv2_1 = encoder_lv2(images_lv2_1 + residual_lv3_top)
                    feature_lv2_2 = encoder_lv2(images_lv2_2 + residual_lv3_bot)
                    feature_lv2 = torch.cat((feature_lv2_1, feature_lv2_2), 2) + torch.cat((feature_lv3_top, feature_lv3_bot), 2)
                    residual_lv2 = decoder_lv2(feature_lv2)
            
                    feature_lv1 = encoder_lv1(images_lv1 + residual_lv2) + feature_lv2
                    deblur_image = decoder_lv1(feature_lv1)
                    stop = time.time()
                    test_time += stop - start
                    print('RunTime:%.4f'%(stop-start), '  Average Runtime:%.4f'%(test_time/(iteration+1)))
                    save_deblur_images(deblur_image.data + 0.5, iteration, epoch)
                
        torch.save(encoder_lv1.state_dict(),str('./checkpoints/' + METHOD + "/encoder_lv1.pkl"))
        torch.save(encoder_lv2.state_dict(),str('./checkpoints/' + METHOD + "/encoder_lv2.pkl"))
        torch.save(encoder_lv3.state_dict(),str('./checkpoints/' + METHOD + "/encoder_lv3.pkl"))
        torch.save(encoder_lv4.state_dict(),str('./checkpoints/' + METHOD + "/encoder_lv4.pkl"))
        torch.save(decoder_lv1.state_dict(),str('./checkpoints/' + METHOD + "/decoder_lv1.pkl"))
        torch.save(decoder_lv2.state_dict(),str('./checkpoints/' + METHOD + "/decoder_lv2.pkl"))
        torch.save(decoder_lv3.state_dict(),str('./checkpoints/' + METHOD + "/decoder_lv3.pkl"))
        torch.save(decoder_lv4.state_dict(),str('./checkpoints/' + METHOD + "/decoder_lv4.pkl"))
                

if __name__ == '__main__':
    main()

        

        
