# Supplementary material
Source: ML conference proceedings conference paper supplement (https://www.ecva.net/papers/eccv_2020/papers_ECCV/html/123580443_ECCV_2020_paper.php)
Supplement: Supplementary file 3 [file 123580443-supp.zip › ECCV_2020_Supplementary/proposed/deblurring/HQS_Stack2.ipynb]

# %% [code]
import torch
import torch as t
from skimage.measure import compare_psnr
import torch.nn as nn
import torch.nn.functional as F
from torch.autograd import Variable
from torch.optim.lr_scheduler import StepLR
import numpy as np
import os
import math
import matplotlib.pyplot as plt
import random
import cv2
import torchvision
from torch.utils.data import Dataset, DataLoader
from torchvision import transforms, datasets
import time
from PIL import Image
import models as models
from utils import *
os.environ["CUDA_VISIBLE_DEVICES"] = "0"
dtype = t.cuda.HalfTensor

# %% [markdown]
# Hyper Parameters

# %% [code]
METHOD = "SDNet2"
basic_dir='datas/GoPro/test/GOPR0881_11_01/'
SAMPLE_DIR = basic_dir + "blur"
EXPDIR = basic_dir + "deblur"
sharp = basic_dir +'sharp'
    
GPU = 0

# %% [markdown]
# Preprocessing

# %% [code]
def save_images(images, name):
    filename =  name + '.png'
    torchvision.utils.save_image(images, filename)

def weight_init(m):
    classname = m.__class__.__name__
    if classname.find('Conv') != -1:
        n = m.kernel_size[0] * m.kernel_size[1] * m.out_channels
        m.weight.data.normal_(0, 0.5*math.sqrt(2. / n))
        if m.bias is not None:
            m.bias.data.zero_()
    elif classname.find('BatchNorm') != -1:
        m.weight.data.fill_(1)
        m.bias.data.zero_()
    elif classname.find('Linear') != -1:
        n = m.weight.size(1)
        m.weight.data.normal_(0, 0.01)
        m.bias.data = torch.ones(m.bias.data.size())


# %% [markdown]
# DMPHN

# %% [code]
encoder = {}
decoder = {}
encoder_optim = {}
decoder_optim = {}
encoder_scheduler = {}
decoder_scheduler = {}
for s in ['s1', 's2']:
    encoder[s] = {}
    decoder[s] = {}
    encoder_optim[s] = {}
    decoder_optim[s] = {}
    encoder_scheduler[s] = {}
    decoder_scheduler[s] = {}
    for lv in ['lv1', 'lv2', 'lv3']:
        encoder[s][lv] = models.Encoder()
        decoder[s][lv] = models.Decoder()
        encoder[s][lv].apply(weight_init).cuda(GPU).half()
        decoder[s][lv].apply(weight_init).cuda(GPU).half()
        
        if os.path.exists(str('./checkpoints/' + METHOD + "/encoder_" + s + "_" + lv + ".pkl")):
            encoder[s][lv].load_state_dict(torch.load(str('./checkpoints/' + METHOD + "/encoder_" + s + "_" + lv + ".pkl")))
            #print("load encoder_" + s + "_" + lv + " successfully!")
        if os.path.exists(str('./checkpoints/' + METHOD + "/decoder_" + s + "_" + lv + ".pkl")):
            decoder[s][lv].load_state_dict(torch.load(str('./checkpoints/' + METHOD + "/decoder_" + s + "_" + lv + ".pkl")))
            #print("load decoder_" + s + "_" + lv + " successfully!")

# %% [code]
def DMPHN(images_lv1):
    images = {}
    feature = {}
    residual = {}
    for s in ['s1', 's2']:
        feature[s] = {}
        residual[s] = {}


    images['lv1'] = images_lv1
    images['lv1'] = Variable(images['lv1']).cuda(GPU).half()
    
    H = images['lv1'].size(2)
    W = images['lv1'].size(3)

    images['lv2_1'] = images['lv1'][:,:,0:int(H/2),:]
    images['lv2_2'] = images['lv1'][:,:,int(H/2):H,:]
    images['lv3_1'] = images['lv2_1'][:,:,:,0:int(W/2)]
    images['lv3_2'] = images['lv2_1'][:,:,:,int(W/2):W]
    images['lv3_3'] = images['lv2_2'][:,:,:,0:int(W/2)]
    images['lv3_4'] = images['lv2_2'][:,:,:,int(W/2):W]

    s = 's1'		
    feature[s]['lv3_1'] = encoder[s]['lv3'](images['lv3_1'])
    feature[s]['lv3_2'] = encoder[s]['lv3'](images['lv3_2'])
    feature[s]['lv3_3'] = encoder[s]['lv3'](images['lv3_3'])
    feature[s]['lv3_4'] = encoder[s]['lv3'](images['lv3_4'])
    feature[s]['lv3_top'] = torch.cat((feature[s]['lv3_1'], feature[s]['lv3_2']), 3)
    feature[s]['lv3_bot'] = torch.cat((feature[s]['lv3_3'], feature[s]['lv3_4']), 3)
    residual[s]['lv3_top'] = decoder[s]['lv3'](feature[s]['lv3_top'])
    residual[s]['lv3_bot'] = decoder[s]['lv3'](feature[s]['lv3_bot'])

    feature[s]['lv2_1'] = encoder[s]['lv2'](images['lv2_1'] + residual[s]['lv3_top']) + feature[s]['lv3_top']
    feature[s]['lv2_2'] = encoder[s]['lv2'](images['lv2_2'] + residual[s]['lv3_bot']) + feature[s]['lv3_bot']
    feature[s]['lv2'] = torch.cat((feature[s]['lv2_1'], feature[s]['lv2_2']), 2)
    residual[s]['lv2'] = decoder[s]['lv2'](feature[s]['lv2'])

    feature[s]['lv1'] = encoder[s]['lv1'](images['lv1'] + residual[s]['lv2']) + feature[s]['lv2']
    residual[s]['lv1'] = decoder[s]['lv1'](feature[s]['lv1'])

    s = 's2'
    ps = 's1'
    feature[s]['lv3_1'] = encoder[s]['lv3'](residual[ps]['lv1'][:,:,0:int(H/2),0:int(W/2)])
    feature[s]['lv3_2'] = encoder[s]['lv3'](residual[ps]['lv1'][:,:,0:int(H/2),int(W/2):W])
    feature[s]['lv3_3'] = encoder[s]['lv3'](residual[ps]['lv1'][:,:,int(H/2):H,0:int(W/2)])
    feature[s]['lv3_4'] = encoder[s]['lv3'](residual[ps]['lv1'][:,:,int(H/2):H,int(W/2):W])
    feature[s]['lv3_top'] = torch.cat((feature[s]['lv3_1'], feature[s]['lv3_2']), 3) + feature[ps]['lv3_top']
    feature[s]['lv3_bot'] = torch.cat((feature[s]['lv3_3'], feature[s]['lv3_4']), 3) + feature[ps]['lv3_bot']
    residual[s]['lv3_top'] = decoder[s]['lv3'](feature[s]['lv3_top'])
    residual[s]['lv3_bot'] = decoder[s]['lv3'](feature[s]['lv3_bot'])

    feature[s]['lv2_1'] = encoder[s]['lv2'](residual[ps]['lv1'][:,:,0:int(H/2),:] + residual[s]['lv3_top']) + feature[s]['lv3_top'] + feature[ps]['lv2_1']
    feature[s]['lv2_2'] = encoder[s]['lv2'](residual[ps]['lv1'][:,:,int(H/2):H,:] + residual[s]['lv3_bot']) + feature[s]['lv3_bot'] + feature[ps]['lv2_2']
    feature[s]['lv2'] = torch.cat((feature[s]['lv2_1'], feature[s]['lv2_2']), 2)
    residual[s]['lv2'] = decoder[s]['lv2'](feature[s]['lv2']) + residual['s1']['lv1']

    feature[s]['lv1'] = encoder[s]['lv1'](residual[ps]['lv1'] + residual[s]['lv2']) + feature[s]['lv2'] + feature[ps]['lv1']
    residual[s]['lv1'] = decoder[s]['lv1'](feature[s]['lv1'])

    deblurred_image = residual[s]['lv1']
   
    return deblurred_image

# %% [code]
class DnCNN(nn.Module):
    def __init__(self, channels, num_of_layers=17):
        super(DnCNN, self).__init__()
        kernel_size = 3
        padding = 1
        features = 64
        layers = []
        layers.append(nn.Conv2d(in_channels=channels, out_channels=features, kernel_size=kernel_size, padding=padding, bias=False))
        layers.append(nn.ReLU(inplace=True))
        for _ in range(num_of_layers-2):
            layers.append(nn.Conv2d(in_channels=features, out_channels=features, kernel_size=kernel_size, padding=padding, bias=False))
            layers.append(nn.BatchNorm2d(features))
            layers.append(nn.ReLU(inplace=True))
        layers.append(nn.Conv2d(in_channels=features, out_channels=channels, kernel_size=kernel_size, padding=padding, bias=False))
        self.dncnn = nn.Sequential(*layers)
    def forward(self, x):
        out = self.dncnn(x)
        return out
    
dncnn_s = DnCNN(channels=3, num_of_layers=17)
device_ids = [0]
dncnn_s = nn.DataParallel(dncnn_s, device_ids=device_ids).cuda().half()
dncnn_s.load_state_dict(torch.load(os.path.join('../Denoising/Deep_Plug_and_play/checkpoints/dncnn_s25.pth')))
dncnn_s.eval()


# %% [code]
print("init data folders")            
psnr_test = 0
import time
psnr_last = []
i=0
ii = 0
#-------------------------------------
#（1）noise
#-------------------------------------
sigma = 0 # 噪音水平
sigma_ = sigma / 255.
start = time.time()
ssim_test = 0
for images_name in os.listdir(SAMPLE_DIR):
    ii+=1
    print('Testing The %d Pictures'%ii)

    gt_pil = Image.open(sharp+'/'+images_name)
    gt_np = pil_to_np(gt_pil)
    gt_torch = np_to_torch(gt_np).cuda(GPU).half()
    img_pil = Image.open(SAMPLE_DIR + '/' + images_name)
    img_np = pil_to_np(img_pil)
    img_noisy_pil, img_noisy_np = get_noisy_image(img_np, sigma_)

    noisy_torch = np_to_torch(img_np)
    gt_torch = Variable(gt_torch)
    noisy_torch = Variable(noisy_torch.cuda(GPU).half())
    yita = 0.2
    #delta =8e-4
    delta =0.001
    lam = 1 - delta*(1 + yita)

    A_ = np.eye(gt_np.shape[1])*lam #shape: [a,a]
    A_T = np.eye(gt_np.shape[1]) # shape: [a,a]
    A = A_T
    rou = 0.00001
    space=np.zeros(gt_np.shape) #shape [3,a,b]
    y = torch_to_np(noisy_torch) #shape: [3,a,b]
    v_0 = np.zeros(gt_np.shape) #shape [3,a,b]
    x_0 = np.zeros(gt_np.shape) #shape [3,a,b]
    for i in range(y.shape[0]):   
        y_ = np.squeeze(y[i,:,:]) 
        x_0[i,:,:] = np.dot(A_T,y_)
    x_next = x_0  #shape [3,a,b]        
    v_next = v_0  #shape [3,a,b]

    with torch.no_grad():
        for k in range(2):  
            for i in range(x_next.shape[0]):
                x_next_ = x_next[i,:,:]
                y_ = y[i,:,:]
                v_next_ = v_next[i,:,:]
                x_next[i,:,:] = A_.dot(x_next_) + delta * A_T.dot(y_) + delta *v_next_ 
            x_next = np_to_torch(x_next).cuda().half()
            v_next = DMPHN(x_next.data-0.5).data+0.5
            x_next = torch_to_np(x_next)
            v_next = torch_to_np(v_next)  
            for j in range(x_next.shape[0]):
                A_temp =  torch_to_np(noisy_torch - dncnn_s(noisy_torch))[j,:,:]#shape [3,a,b]
                x_temp =  ((v_next[j,:,:].T).dot(A)).dot(v_next[j,:,:])[:gt_np.shape[1],:]#
                space[j,:,:] = rou*(A_temp+x_temp)
            t =  ((space[0,:,:]+space[1,:,:]+space[2,:,:])/3)[:gt_np.shape[1],:gt_np.shape[1]]

            A = (A -t)[:gt_np.shape[1],:gt_np.shape[1]]
            A_T = A.T

            v_hat = np_to_torch(v_next) 

        psnr = batch_PSNR(v_hat,gt_torch,1.)
        ssim = batch_SSIM(v_hat,gt_torch)
        ssim_test += ssim
        out_img = torch_to_np(v_hat).astype(np.float32)

        #plot_image_grid([np.clip(out_img, 0, 1),
        #                 np.clip(img_noisy_np, 0, 1),np.clip(gt_np, 0, 1)], factor=20, nrow=3)
        #save_images(np_to_torch(out_img),str(k))
        tim = time.time() - start
        print ('PSNR: %f  SSIM: %f  Time consumes: %f' % (psnr,ssim,tim), '\r',
        end='')
        print('\n')

    psnr_last.append(psnr)

psnr_last = np.asarray(psnr_last)
print('Average PSNR for testing is: %.8f'%(psnr_last.mean()))
#print(psnr_last)
ssim_test /= len(os.listdir(SAMPLE_DIR))
print("\nAverage SSIM on test data is: %f" % ssim_test)
end = time.time() - start
print('The total time is %f' % end)
print(basic_dir)
