# Supplementary material
Source: ML conference proceedings conference paper supplement (https://www.ecva.net/papers/eccv_2020/papers_ECCV/html/123580443_ECCV_2020_paper.php)
Supplement: Supplementary file 3 [file 123580443-supp.zip › ECCV_2020_Supplementary/proposed/deblurring/HQS_Stack3.ipynb]

# %% [code]
import torch
import torch as t
from skimage.measure import compare_psnr
import torch.nn as nn
import torch.nn.functional as F
from torch.autograd import Variable
from torch.optim.lr_scheduler import StepLR
import numpy as np
import os
import math
import matplotlib.pyplot as plt
import random
import cv2
import torchvision
from torch.utils.data import Dataset, DataLoader
from torchvision import transforms, datasets
import time
from PIL import Image
import models as models
from utils import *
os.environ["CUDA_VISIBLE_DEVICES"] = "0"
dtype = t.cuda.HalfTensor

# %% [markdown]
# Hyper Parameters

# %% [code]
METHOD = "SDNet3"
basic_dir='datas/GoPro/test/GOPR0881_11_01/'
SAMPLE_DIR = basic_dir + "blur"
EXPDIR = basic_dir + "deblur"
sharp = basic_dir +'sharp'
    
GPU = 0

# %% [markdown]
# Preprocessing

# %% [code]
def save_images(images, name):
    filename =  name + '.png'
    torchvision.utils.save_image(images, filename)

def weight_init(m):
    classname = m.__class__.__name__
    if classname.find('Conv') != -1:
        n = m.kernel_size[0] * m.kernel_size[1] * m.out_channels
        m.weight.data.normal_(0, 0.5*math.sqrt(2. / n))
        if m.bias is not None:
            m.bias.data.zero_()
    elif classname.find('BatchNorm') != -1:
        m.weight.data.fill_(1)
        m.bias.data.zero_()
    elif classname.find('Linear') != -1:
        n = m.weight.size(1)
        m.weight.data.normal_(0, 0.01)
        m.bias.data = torch.ones(m.bias.data.size())


# %% [markdown]
# DMPHN

# %% [code]
encoder = {}
decoder = {}
encoder_optim = {}
decoder_optim = {}
encoder_scheduler = {}
decoder_scheduler = {}
for s in ['s1', 's2', 's3']:
    encoder[s] = {}
    decoder[s] = {}
    encoder_optim[s] = {}
    decoder_optim[s] = {}
    encoder_scheduler[s] = {}
    decoder_scheduler[s] = {}
    for lv in ['lv1', 'lv2', 'lv3']:
        encoder[s][lv] = models.Encoder()
        decoder[s][lv] = models.Decoder()
        encoder[s][lv].apply(weight_init).cuda(GPU).half()
        decoder[s][lv].apply(weight_init).cuda(GPU).half()
        
        if os.path.exists(str('./checkpoints/' + METHOD + "/encoder_" + s + "_" + lv + ".pkl")):
            encoder[s][lv].load_state_dict(torch.load(str('./checkpoints/' + METHOD + "/encoder_" + s + "_" + lv + ".pkl")))
            #print("load encoder_" + s + "_" + lv + " successfully!")
        if os.path.exists(str('./checkpoints/' + METHOD + "/decoder_" + s + "_" + lv + ".pkl")):
            decoder[s][lv].load_state_dict(torch.load(str('./checkpoints/' + METHOD + "/decoder_" + s + "_" + lv + ".pkl")))
            #print("load decoder_" + s + "_" + lv + " successfully!")

# %% [code]
def DMPHN(images_lv1):
    images = {}
    feature = {}
    residual = {}
    for s in ['s1', 's2', 's3']:
        feature[s] = {}
        residual[s] = {}


    images['lv1'] = images_lv1
    images['lv1'] = Variable(images['lv1']).cuda(GPU).half()
    
    H = images['lv1'].size(2)
    W = images['lv1'].size(3)

    images['lv2_1'] = images['lv1'][:,:,0:int(H/2),:]
    images['lv2_2'] = images['lv1'][:,:,int(H/2):H,:]
    images['lv3_1'] = images['lv2_1'][:,:,:,0:int(W/2)]
    images['lv3_2'] = images['lv2_1'][:,:,:,int(W/2):W]
    images['lv3_3'] = images['lv2_2'][:,:,:,0:int(W/2)]
    images['lv3_4'] = images['lv2_2'][:,:,:,int(W/2):W]

    s = 's1'		
    feature[s]['lv3_1'] = encoder[s]['lv3'](images['lv3_1'])
    feature[s]['lv3_2'] = encoder[s]['lv3'](images['lv3_2'])
    feature[s]['lv3_3'] = encoder[s]['lv3'](images['lv3_3'])
    feature[s]['lv3_4'] = encoder[s]['lv3'](images['lv3_4'])
    feature[s]['lv3_top'] = torch.cat((feature[s]['lv3_1'], feature[s]['lv3_2']), 3)
    feature[s]['lv3_bot'] = torch.cat((feature[s]['lv3_3'], feature[s]['lv3_4']), 3)
    residual[s]['lv3_top'] = decoder[s]['lv3'](feature[s]['lv3_top'])
    residual[s]['lv3_bot'] = decoder[s]['lv3'](feature[s]['lv3_bot'])

    feature[s]['lv2_1'] = encoder[s]['lv2'](images['lv2_1'] + residual[s]['lv3_top']) + feature[s]['lv3_top']
    feature[s]['lv2_2'] = encoder[s]['lv2'](images['lv2_2'] + residual[s]['lv3_bot']) + feature[s]['lv3_bot']
    feature[s]['lv2'] = torch.cat((feature[s]['lv2_1'], feature[s]['lv2_2']), 2)
    residual[s]['lv2'] = decoder[s]['lv2'](feature[s]['lv2'])

    feature[s]['lv1'] = encoder[s]['lv1'](images['lv1'] + residual[s]['lv2']) + feature[s]['lv2']
    residual[s]['lv1'] = decoder[s]['lv1'](feature[s]['lv1'])

    s = 's2'
    ps = 's1'
    feature[s]['lv3_1'] = encoder[s]['lv3'](residual[ps]['lv1'][:,:,0:int(H/2),0:int(W/2)])
    feature[s]['lv3_2'] = encoder[s]['lv3'](residual[ps]['lv1'][:,:,0:int(H/2),int(W/2):W])
    feature[s]['lv3_3'] = encoder[s]['lv3'](residual[ps]['lv1'][:,:,int(H/2):H,0:int(W/2)])
    feature[s]['lv3_4'] = encoder[s]['lv3'](residual[ps]['lv1'][:,:,int(H/2):H,int(W/2):W])
    feature[s]['lv3_top'] = torch.cat((feature[s]['lv3_1'], feature[s]['lv3_2']), 3) + feature[ps]['lv3_top']
    feature[s]['lv3_bot'] = torch.cat((feature[s]['lv3_3'], feature[s]['lv3_4']), 3) + feature[ps]['lv3_bot']
    residual[s]['lv3_top'] = decoder[s]['lv3'](feature[s]['lv3_top'])
    residual[s]['lv3_bot'] = decoder[s]['lv3'](feature[s]['lv3_bot'])

    feature[s]['lv2_1'] = encoder[s]['lv2'](residual[ps]['lv1'][:,:,0:int(H/2),:] + residual[s]['lv3_top']) + feature[s]['lv3_top'] + feature[ps]['lv2_1']
    feature[s]['lv2_2'] = encoder[s]['lv2'](residual[ps]['lv1'][:,:,int(H/2):H,:] + residual[s]['lv3_bot']) + feature[s]['lv3_bot'] + feature[ps]['lv2_2']
    feature[s]['lv2'] = torch.cat((feature[s]['lv2_1'], feature[s]['lv2_2']), 2)
    residual[s]['lv2'] = decoder[s]['lv2'](feature[s]['lv2']) + residual['s1']['lv1']

    feature[s]['lv1'] = encoder[s]['lv1'](residual[ps]['lv1'] + residual[s]['lv2']) + feature[s]['lv2'] + feature[ps]['lv1']
    residual[s]['lv1'] = decoder[s]['lv1'](feature[s]['lv1'])

    s = 's3'
    ps = 's2'
    feature[s]['lv3_1'] = encoder[s]['lv3'](residual[ps]['lv1'][:,:,0:int(H/2),0:int(W/2)])
    feature[s]['lv3_2'] = encoder[s]['lv3'](residual[ps]['lv1'][:,:,0:int(H/2),int(W/2):W])
    feature[s]['lv3_3'] = encoder[s]['lv3'](residual[ps]['lv1'][:,:,int(H/2):H,0:int(W/2)])
    feature[s]['lv3_4'] = encoder[s]['lv3'](residual[ps]['lv1'][:,:,int(H/2):H,int(W/2):W])
    feature[s]['lv3_top'] = torch.cat((feature[s]['lv3_1'], feature[s]['lv3_2']), 3) + feature[ps]['lv3_top']
    feature[s]['lv3_bot'] = torch.cat((feature[s]['lv3_3'], feature[s]['lv3_4']), 3) + feature[ps]['lv3_bot']
    residual[s]['lv3_top'] = decoder[s]['lv3'](feature[s]['lv3_top'])
    residual[s]['lv3_bot'] = decoder[s]['lv3'](feature[s]['lv3_bot'])

    feature[s]['lv2_1'] = encoder[s]['lv2'](residual[ps]['lv1'][:,:,0:int(H/2),:] + residual[s]['lv3_top']) + feature[s]['lv3_top'] + feature[ps]['lv2_1']
    feature[s]['lv2_2'] = encoder[s]['lv2'](residual[ps]['lv1'][:,:,int(H/2):H,:] + residual[s]['lv3_bot']) + feature[s]['lv3_bot'] + feature[ps]['lv2_2']
    feature[s]['lv2'] = torch.cat((feature[s]['lv2_1'], feature[s]['lv2_2']), 2)
    residual[s]['lv2'] = decoder[s]['lv2'](feature[s]['lv2']) + residual['s1']['lv1']

    feature[s]['lv1'] = encoder[s]['lv1'](residual[ps]['lv1'] + residual[s]['lv2']) + feature[s]['lv2'] + feature[ps]['lv1']
    residual[s]['lv1'] = decoder[s]['lv1'](feature[s]['lv1'])

    deblurred_image = residual[s]['lv1']
   
    return deblurred_image

# %% [code]
class DnCNN(nn.Module):
    def __init__(self, channels, num_of_layers=17):
        super(DnCNN, self).__init__()
        kernel_size = 3
        padding = 1
        features = 64
        layers = []
        layers.append(nn.Conv2d(in_channels=channels, out_channels=features, kernel_size=kernel_size, padding=padding, bias=False))
        layers.append(nn.ReLU(inplace=True))
        for _ in range(num_of_layers-2):
            layers.append(nn.Conv2d(in_channels=features, out_channels=features, kernel_size=kernel_size, padding=padding, bias=False))
            layers.append(nn.BatchNorm2d(features))
            layers.append(nn.ReLU(inplace=True))
        layers.append(nn.Conv2d(in_channels=features, out_channels=channels, kernel_size=kernel_size, padding=padding, bias=False))
        self.dncnn = nn.Sequential(*layers)
    def forward(self, x):
        out = self.dncnn(x)
        return out
    
dncnn_s = DnCNN(channels=3, num_of_layers=17)
device_ids = [0]
dncnn_s = nn.DataParallel(dncnn_s, device_ids=device_ids).cuda().half()
dncnn_s.load_state_dict(torch.load(os.path.join('../Denoising/Deep_Plug_and_play/checkpoints/dncnn_s25.pth')))
dncnn_s.eval()


# %% [code]
print("init data folders")            
psnr_test = 0
import time
psnr_last = []
i=0
ii = 0
#-------------------------------------
#（1）noise
#-------------------------------------
sigma = 0 # 噪音水平
sigma_ = sigma / 255.
start = time.time()
ssim_test = 0
for images_name in os.listdir(SAMPLE_DIR):
    ii+=1
    print('Testing The %d Pictures'%ii)

    gt_pil = Image.open(sharp+'/'+images_name)
    gt_np = pil_to_np(gt_pil)
    gt_torch = np_to_torch(gt_np).cuda(GPU).half()
    img_pil = Image.open(SAMPLE_DIR + '/' + images_name)
    img_np = pil_to_np(img_pil)
    img_noisy_pil, img_noisy_np = get_noisy_image(img_np, sigma_)

    noisy_torch = np_to_torch(img_np)
    gt_torch = Variable(gt_torch)
    noisy_torch = Variable(noisy_torch.cuda(GPU).half())
    yita = 0.2
    #delta =8e-4
    delta =0.001
    lam = 1 - delta*(1 + yita)

    A_ = np.eye(gt_np.shape[1])*lam #shape: [a,a]
    A_T = np.eye(gt_np.shape[1]) # shape: [a,a]
    A = A_T
    rou = 0.00001
    space=np.zeros(gt_np.shape) #shape [3,a,b]
    y = torch_to_np(noisy_torch) #shape: [3,a,b]
    v_0 = np.zeros(gt_np.shape) #shape [3,a,b]
    x_0 = np.zeros(gt_np.shape) #shape [3,a,b]
    for i in range(y.shape[0]):   
        y_ = np.squeeze(y[i,:,:]) 
        x_0[i,:,:] = np.dot(A_T,y_)
    x_next = x_0  #shape [3,a,b]        
    v_next = v_0  #shape [3,a,b]

    with torch.no_grad():
        for k in range(2):  
            for i in range(x_next.shape[0]):
                x_next_ = x_next[i,:,:]
                y_ = y[i,:,:]
                v_next_ = v_next[i,:,:]
                x_next[i,:,:] = A_.dot(x_next_) + delta * A_T.dot(y_) + delta *v_next_ 
            x_next = np_to_torch(x_next).cuda().half()
            v_next = DMPHN(x_next.data-0.5).data+0.5
            x_next = torch_to_np(x_next)
            v_next = torch_to_np(v_next)  
            for j in range(x_next.shape[0]):
                A_temp =  torch_to_np(noisy_torch - dncnn_s(noisy_torch))[j,:,:]#shape [3,a,b]
                x_temp =  ((v_next[j,:,:].T).dot(A)).dot(v_next[j,:,:])[:gt_np.shape[1],:]#
                space[j,:,:] = rou*(A_temp+x_temp)
            t =  ((space[0,:,:]+space[1,:,:]+space[2,:,:])/3)[:gt_np.shape[1],:gt_np.shape[1]]

            A = (A -t)[:gt_np.shape[1],:gt_np.shape[1]]
            A_T = A.T

            v_hat = np_to_torch(v_next) 

        psnr = batch_PSNR(v_hat,gt_torch,1.)
        ssim = batch_SSIM(v_hat,gt_torch)
        ssim_test += ssim
        out_img = torch_to_np(v_hat).astype(np.float32)

        #plot_image_grid([np.clip(out_img, 0, 1),
        #                 np.clip(img_noisy_np, 0, 1),np.clip(gt_np, 0, 1)], factor=20, nrow=3)
        #save_images(np_to_torch(out_img),str(k))
        tim = time.time() - start
        print ('PSNR: %f  SSIM: %f  Time consumes: %f' % (psnr,ssim,tim), '\r',
        end='')
        print('\n')

    psnr_last.append(psnr)

psnr_last = np.asarray(psnr_last)
print('Average PSNR for testing is: %.8f'%(psnr_last.mean()))
#print(psnr_last)
ssim_test /= len(os.listdir(SAMPLE_DIR))
print("\nAverage SSIM on test data is: %f" % ssim_test)
end = time.time() - start
print('The total time is %f' % end)
print(basic_dir)
