# Supplementary material
Source: ML conference proceedings conference paper supplement (https://www.ecva.net/papers/eccv_2020/papers_ECCV/html/123580443_ECCV_2020_paper.php)
Supplement: Supplementary file 3 [file 123580443-supp.zip › ECCV_2020_Supplementary/proposed/deblurring/models.py]

import torch
import torch.nn as nn
import torch.nn.functional as F

class Encoder(nn.Module):
    def __init__(self):
        super(Encoder, self).__init__()
        #Conv1
        self.layer1 = nn.Conv2d(3, 32, kernel_size=3, padding=1)
        self.layer2 = nn.Sequential(
            nn.Conv2d(32, 32, kernel_size=3, padding=1),
            nn.ReLU(),
            nn.Conv2d(32, 32, kernel_size=3, padding=1)
            )
        self.layer3 = nn.Sequential(
            nn.Conv2d(32, 32, kernel_size=3, padding=1),
            nn.ReLU(),
            nn.Conv2d(32, 32, kernel_size=3, padding=1)
            )
        #Conv2
        self.layer5 = nn.Conv2d(32, 64, kernel_size=3, stride=2, padding=1)
        self.layer6 = nn.Sequential(
            nn.Conv2d(64, 64, kernel_size=3, padding=1),
            nn.ReLU(),
            nn.Conv2d(64, 64, kernel_size=3, padding=1)
            )
        self.layer7 = nn.Sequential(
            nn.Conv2d(64, 64, kernel_size=3, padding=1),
            nn.ReLU(),
            nn.Conv2d(64, 64, kernel_size=3, padding=1)
            )
        #Conv3
        self.layer9 = nn.Conv2d(64, 128, kernel_size=3, stride=2, padding=1)
        self.layer10 = nn.Sequential(
            nn.Conv2d(128, 128, kernel_size=3, padding=1),
            nn.ReLU(),
            nn.Conv2d(128, 128, kernel_size=3, padding=1)
            )
        self.layer11 = nn.Sequential(
            nn.Conv2d(128, 128, kernel_size=3, padding=1),
            nn.ReLU(),
            nn.Conv2d(128, 128, kernel_size=3, padding=1)
            )
        
    def forward(self, x):
        #Conv1
        x = self.layer1(x)
        x = self.layer2(x) + x
        x = self.layer3(x) + x
        #Conv2
        x = self.layer5(x)
        x = self.layer6(x) + x
        x = self.layer7(x) + x
        #Conv3
        x = self.layer9(x)    
        x = self.layer10(x) + x
        x = self.layer11(x) + x 
        return x

class Decoder(nn.Module):
    def __init__(self):
        super(Decoder, self).__init__()        
        # Deconv3
        self.layer13 = nn.Sequential(
            nn.Conv2d(128, 128, kernel_size=3, padding=1),
            nn.ReLU(),
            nn.Conv2d(128, 128, kernel_size=3, padding=1)
            )
        self.layer14 = nn.Sequential(
            nn.Conv2d(128, 128, kernel_size=3, padding=1),
            nn.ReLU(),
            nn.Conv2d(128, 128, kernel_size=3, padding=1)
            )
        self.layer16 = nn.ConvTranspose2d(128, 64, kernel_size=4, stride=2, padding=1)
        #Deconv2
        self.layer17 = nn.Sequential(
            nn.Conv2d(64, 64, kernel_size=3, padding=1),
            nn.ReLU(),
            nn.Conv2d(64, 64, kernel_size=3, padding=1)
            )
        self.layer18 = nn.Sequential(
            nn.Conv2d(64, 64, kernel_size=3, padding=1),
            nn.ReLU(),
            nn.Conv2d(64, 64, kernel_size=3, padding=1)
            )
        self.layer20 = nn.ConvTranspose2d(64, 32, kernel_size=4, stride=2, padding=1)
        #Deconv1
        self.layer21 = nn.Sequential(
            nn.Conv2d(32, 32, kernel_size=3, padding=1),
            nn.ReLU(),
            nn.Conv2d(32, 32, kernel_size=3, padding=1)
            )
        self.layer22 = nn.Sequential(
            nn.Conv2d(32, 32, kernel_size=3, padding=1),
            nn.ReLU(),
            nn.Conv2d(32, 32, kernel_size=3, padding=1)
            )
        self.layer24 = nn.Conv2d(32, 3, kernel_size=3, padding=1)
        
    def forward(self,x):        
        #Deconv3
        x = self.layer13(x) + x
        x = self.layer14(x) + x
        x = self.layer16(x)                
        #Deconv2
        x = self.layer17(x) + x
        x = self.layer18(x) + x
        x = self.layer20(x)
        #Deconv1
        x = self.layer21(x) + x
        x = self.layer22(x) + x
        x = self.layer24(x)
        return x
