# Supplementary material
Source: ML conference proceedings conference paper supplement (https://www.ecva.net/papers/eccv_2020/papers_ECCV/html/123580443_ECCV_2020_paper.php)
Supplement: Supplementary file 3 [file 123580443-supp.zip › ECCV_2020_Supplementary/proposed/denoising/framework/utils.py]

import torch as t
import torch.nn as nn
import torch.optim
import torch
import random
import torchvision
from torchvision import transforms
from torch.autograd import Variable
from torch.utils import data as dat
import sys
from sys import platform
from string import ascii_letters
import os
from PIL import Image
from PIL import Image, ImageFont, ImageDraw
import numpy as np
import matplotlib.pyplot as plt
import math
import numpy as np
from skimage.measure.simple_metrics import compare_psnr
from skimage.measure import compare_ssim

def crop_image(img, d=32):
    '''Make dimensions divisible by `d`'''

    new_size = (img.size[0] - img.size[0] % d,
                img.size[1] - img.size[1] % d)

    bbox = [
        int((img.size[0] - new_size[0]) / 2),
        int((img.size[1] - new_size[1]) / 2),
        int((img.size[0] + new_size[0]) / 2),
        int((img.size[1] + new_size[1]) / 2),
    ]

    img_cropped = img.crop(bbox)
    return img_cropped


def get_params(opt_over, net, net_input, downsampler=None):
    '''Returns parameters that we want to optimize over.

    Args:
        opt_over: comma separated list, e.g. "net,input" or "net"
        net: network
        net_input: torch.Tensor that stores input `z`
    '''
    opt_over_list = opt_over.split(',')
    params = []

    for opt in opt_over_list:

        if opt == 'net':
            params += [x for x in net.parameters()]
        elif opt == 'down':
            assert downsampler is not None
            params = [x for x in downsampler.parameters()]
        elif opt == 'input':
            net_input.requires_grad = True
            params += [net_input]
        else:
            assert False, 'what is it?'

    return params


def get_image_grid(images_np, nrow=8):
    '''Creates a grid from a list of images by concatenating them.'''
    images_torch = [t.from_numpy(x) for x in images_np]
    torch_grid = torchvision.utils.make_grid(images_torch, nrow)

    return torch_grid.numpy()


def plot_image_grid(images_np, nrow=8, factor=1, interpolation='lanczos'):
    """Draws images in a grid

    Args:
        images_np: list of images, each image is np.array of size 3xHxW of 1xHxW
        nrow: how many images will be in one row
        factor: size if the plt.figure
        interpolation: interpolation used in plt.imshow
    """
    n_channels = max(x.shape[0] for x in images_np)
    assert (n_channels == 3) or (n_channels == 1), "images should have 1 or 3 channels"

    images_np = [x if (x.shape[0] == n_channels) else np.concatenate([x, x, x], axis=0) for x in images_np]

    grid = get_image_grid(images_np, nrow)

    plt.figure(figsize=(len(images_np) + factor, 12 + factor))

    if images_np[0].shape[0] == 1:
        plt.imshow(grid[0], cmap='gray', interpolation=interpolation)
    else:
        plt.imshow(grid.transpose(1, 2, 0), interpolation=interpolation)

    plt.show()

    return grid


def load(path):
    """Load PIL image."""
    img = Image.open(path).convert('RGB')
    return img


def get_image(path, imsize=-1):
    """Load an image and resize to a specific size.

    Args:
        path: path to image
        imsize: tuple or scalar with dimensions; -1 for `no resize`
    """
    img = load(path)

    if isinstance(imsize, int):
        imsize = (imsize, imsize)

    if imsize[0] != -1 and img.size != imsize:
        if imsize[0] > img.size[0]:
            img = img.resize(imsize, Image.BICUBIC)
        else:
            img = img.resize(imsize, Image.ANTIALIAS)

    img_np = pil_to_np(img)

    return img, img_np


def fill_noise(x, noise_type):
    """Fills tensor `x` with noise of type `noise_type`."""
    if noise_type == 'u':
        x.uniform_()
    elif noise_type == 'n':
        x.normal_()
    else:
        assert False


def get_noise(input_depth, method, spatial_size, noise_type='u', var=1. / 10):
    """Returns a pytorch.Tensor of size (1 x `input_depth` x `spatial_size[0]` x `spatial_size[1]`)
    initialized in a specific way.
    Args:
        input_depth: number of channels in the tensor
        method: `noise` for fillting tensor with noise; `meshgrid` for np.meshgrid
        spatial_size: spatial size of the tensor to initialize
        noise_type: 'u' for uniform; 'n' for normal
        var: a factor, a noise will be multiplicated by. Basically it is standard deviation scaler.
    """
    if isinstance(spatial_size, int):
        spatial_size = (spatial_size, spatial_size)
    if method == 'noise':
        shape = [1, input_depth, spatial_size[0], spatial_size[1]]
        net_input = t.zeros(shape)

        fill_noise(net_input, noise_type)
        net_input *= var
    elif method == 'meshgrid':
        assert input_depth == 2
        X, Y = np.meshgrid(np.arange(0, spatial_size[1]) / float(spatial_size[1] - 1),
                           np.arange(0, spatial_size[0]) / float(spatial_size[0] - 1))
        meshgrid = np.concatenate([X[None, :], Y[None, :]])
        net_input = np_to_torch(meshgrid)
    else:
        assert False

    return net_input


def pil_to_np(img_PIL):
    '''Converts image in PIL format to np.array.

    From W x H x C [0...255] to C x W x H [0..1]
    '''
    ar = np.array(img_PIL)

    if len(ar.shape) == 3:
        ar = ar.transpose(2, 0, 1)
    else:
        ar = ar[None, ...]

    return ar.astype(np.float32) / 255.


def np_to_pil(img_np):
    '''Converts image in np.array format to PIL image.

    From C x W x H [0..1] to  W x H x C [0...255]
    '''
    ar = np.clip(img_np * 255, 0, 255).astype(np.uint8)

    if img_np.shape[0] == 1:
        ar = ar[0]
    else:
        ar = ar.transpose(1, 2, 0)

    return Image.fromarray(ar)


def np_to_torch(img_np):
    '''Converts image in numpy.array to torch.Tensor.

    From C x W x H [0..1] to  C x W x H [0..1]
    '''
    return t.from_numpy(img_np)[None, :]


def torch_to_np(img_var):
    '''Converts an image in torch.Tensor format to np.array.

    From 1 x C x W x H [0..1] to  C x W x H [0..1]
    '''
    return img_var.detach().cpu().numpy()[0]

def torch_to_pil(img_var):
    return np_to_pil(torch_to_np(img_var))

def pil_to_torch(img_pil):
    return np_to_torch(pil_to_np(img_pil))

def get_noisy_image(img_np, sigma):
    """Adds Gaussian noise to an image.

    Args:
        img_np: image, np.array with values from 0 to 1
        sigma: std of the noise
    """
    img_noisy_np = np.clip(img_np + np.random.normal(scale=sigma, size=img_np.shape), 0, 1).astype(np.float32)
    img_noisy_pil = np_to_pil(img_noisy_np)

    return img_noisy_pil, img_noisy_np

def get_poisson_noisy_image(img_np, sigma):
    """Adds possian noise to an image.

    Args:
        img_np: image, np.array with values from 0 to 1
        sigma: std of the noise
    """
    img_noisy_np = np.clip(img_np + np.random.poisson(sigma, size=img_np.shape), 0, 1).astype(np.float32)
    img_noisy_pil = np_to_pil(img_noisy_np)

    return img_noisy_pil, img_noisy_np

def get_binomial_noisy_image(img_np,lam):
    """Adds binomial noise to an image.

    Args:
        img_np: image, np.array with values from 0 to 1
        sigma: std of the noise
    """
    img_noisy_np = np.clip(img_np + np.random.binomial(1,lam,size=img_np.shape), 0, 1).astype(np.float32)
    img_noisy_pil = np_to_pil(img_noisy_np)

    return img_noisy_pil, img_noisy_np

def addsalt_pepper(img_np, SNR):
    img_ = img_np.copy()
    c, h, w = img_.shape
    mask = np.random.choice((0, 1, 2), size=(1, h, w), p=[SNR, (1 - SNR) / 2., (1 - SNR) / 2.])
    mask = np.repeat(mask, c, axis=0)     # 按channel 复制到 与img具有相同的shape
    img_[mask == 1] = 255    # 盐噪声
    img_[mask == 2] = 0      # 椒噪声
    return img_
def add_text(img,noise_param):
    """Adds text overlay to images."""
    w, h = img.size
    c = len(img.getbands())
    
    # Choose font and get ready to draw
    if platform == 'linux':
        serif = '/usr/share/fonts/truetype/dejavu/DejaVuSerif.ttf'
    else:
        serif = 'Times New Roman.ttf'
    text_img = img.copy()
    text_draw = ImageDraw.Draw(text_img)

    # Text binary mask to compute occupancy efficiently
    w, h = img.size
    mask_img = Image.new('1', (w, h))
    mask_draw = ImageDraw.Draw(mask_img)

    # Random occupancy in range [0, p]

    max_occupancy = np.random.uniform(0, noise_param)
    def get_occupancy(x):
        y = np.array(x, dtype=np.uint8)
        return np.sum(y) / y.size

    # Add text overlay by choosing random text, length, color and position
    while 1:
        font = ImageFont.truetype(serif, np.random.randint(16, 21))
        length = np.random.randint(10, 25)
        chars = ''.join(random.choice(ascii_letters) for i in range(length))
        color = tuple(np.random.randint(0, 255, c))
        pos = (np.random.randint(0, w), np.random.randint(0, h))
        text_draw.text(pos, chars, color, font=font)

        # Update mask and check occupancy
        mask_draw.text(pos, chars, 1, font=font)
        if get_occupancy(mask_img) > max_occupancy:
            break

    return text_img

def weights_init_kaiming(m):
    classname = m.__class__.__name__
    if classname.find('Conv') != -1:
        nn.init.kaiming_normal(m.weight.data, a=0, mode='fan_in')
    elif classname.find('Linear') != -1:
        nn.init.kaiming_normal(m.weight.data, a=0, mode='fan_in')
    elif classname.find('BatchNorm') != -1:
        # nn.init.uniform(m.weight.data, 1.0, 0.02)
        m.weight.data.normal_(mean=0, std=math.sqrt(2./9./64.)).clamp_(-0.025,0.025)
        nn.init.constant(m.bias.data, 0.0)
def batch_SSIM(img, imclean):
    img = torch.transpose(img, 1, 3)
    imclean = torch.transpose(imclean, 1, 3)
    Img = img.data.cpu().numpy().astype(np.float32)
    Iclean = imclean.data.cpu().numpy().astype(np.float32)
    SSIM = 0
    for i in range(Img.shape[0]):
        SSIM += compare_ssim(Iclean[i,:,:,:], Img[i,:,:,:],multichannel=True)
    return (SSIM/Img.shape[0])

def batch_PSNR(img, imclean, data_range):
    Img = img.data.cpu().numpy().astype(np.float32)
    Iclean = imclean.data.cpu().numpy().astype(np.float32)
    PSNR = 0
    for i in range(Img.shape[0]):
        PSNR += compare_psnr(Iclean[i,:,:,:], Img[i,:,:,:], data_range=data_range)
    return (PSNR/Img.shape[0])

def data_augmentation(image, mode):
    out = np.transpose(image, (1,2,0))
    if mode == 0:
        # original
        out = out
    elif mode == 1:
        # flip up and down
        out = np.flipud(out)
    elif mode == 2:
        # rotate counterwise 90 degree
        out = np.rot90(out)
    elif mode == 3:
        # rotate 90 degree and flip up and down
        out = np.rot90(out)
        out = np.flipud(out)
    elif mode == 4:
        # rotate 180 degree
        out = np.rot90(out, k=2)
    elif mode == 5:
        # rotate 180 degree and flip
        out = np.rot90(out, k=2)
        out = np.flipud(out)
    elif mode == 6:
        # rotate 270 degree
        out = np.rot90(out, k=3)
    elif mode == 7:
        # rotate 270 degree and flip
        out = np.rot90(out, k=3)
        out = np.flipud(out)
    return np.transpose(out, (2,0,1))
