# Supplementary material
Source: ML conference proceedings conference paper supplement (https://www.ecva.net/papers/eccv_2020/papers_ECCV/html/123580443_ECCV_2020_paper.php)
Supplement: Supplementary file 3 [file 123580443-supp.zip › ECCV_2020_Supplementary/proposed/denoising/train/N2N_train/ReadMe.md]

# Noise2Noise: Learning Image Restoration without Clean Data

This is an unofficial PyTorch implementation of [Noise2Noise](https://arxiv.org/abs/1803.04189) (Lehtinen et al. 2018).

## Dependencies

* [PyTorch](https://pytorch.org/) (0.4.1)
* [Torchvision](https://pytorch.org/docs/stable/torchvision/index.html) (0.2.0)
* [NumPy](http://www.numpy.org/) (1.14.2)
* [Matplotlib](https://matplotlib.org/) (2.2.3)
* [Pillow](https://pillow.readthedocs.io/en/latest/index.html) (5.2.0)
* [OpenEXR](http://www.openexr.com/) (1.3.0)

To install the latest version of all packages, run
```
pip3 install --user -r requirements.txt
```

This code was tested on Python 3.6.5 on macOS High Sierra (10.13.4) and Ubuntu 16.04. It will fail with Python 2.7.x due to usage of 3.6-specific functions. Note that training and testing will also fail on Windows out of the box due to differences in the path resolvers (`os.path`).

## Dataset

The authors use [ImageNet](http://image-net.org/download), but any dataset will do. [COCO 2017](http://cocodataset.org/#download) has a small validation set (1 GB) which can be nicely split into train/valid for easier training. For instance, to obtain a 4200/800 train/valid split you can do:
```
mkdir data && cd data
mkdir train valid test
wget http://images.cocodataset.org/zips/val2017.zip
unzip val2017.zip && cd val2017
mv `ls | head -4200` ../train
mv `ls | head -800` ../valid
```

You can also download the full datasets (7 GB) that more or less match the paper, if you have the bandwidth:

```
mkdir data && cd data
mkdir train valid test
wget http://images.cocodataset.org/zips/test2017.zip
wget http://images.cocodataset.org/zips/val2017.zip
unzip -j test2017.zip -d train
unzip -j val2017.zip -d valid
```

Add your favorite images to the `data/test` folder. Only a handful will do to visually inspect the denoiser performance.

## Training

See `python3 train.py --h` for list of optional arguments, or `examples/train.sh` for an example.

By default, the model train with noisy targets. To train with clean targets, use `--clean-targets`. To train and validate on smaller datasets, use the `--train-size` and `--valid-size` options. To plot stats as the model trains, use `--plot-stats`; these are saved alongside checkpoints. By default CUDA is not enabled: use the `--cuda` option if you have a GPU that supports it.

### Gaussian noise
The noise parameter is the maximum standard deviation σ.
```
python3 train.py \
  --train-dir ../data/train --train-size 1000 \
  --valid-dir ../data/valid --valid-size 200 \
  --ckpt-save-path ../ckpts \
  --nb-epochs 10 \
  --batch-size 4 \
  --loss l2 \
  --noise-type gaussian \
  --noise-param 50 \
  --crop-size 64 \
  --plot-stats \
  --cuda
```

### Poisson noise
The noise parameter is the Poisson parameter λ.
```
python3 train.py
  --loss l2 \
  --noise-type poisson \
  --noise-param 50 \
  --cuda
```

### Text overlay
The noise parameter is the approximate probability *p* that a pixel is covered by text.
```
python3 train.py \
  --loss l1 \
  --noise-type text \
  --noise-param 0.5 \
  --cuda
```

### Monte Carlo rendering noise

See [other read-me file](MonteCarlo.md).

## Testing

Model checkpoints are automatically saved after every epoch. To test the denoiser, provide `test.py` with a PyTorch model (`.pt` file) via the argument `--load-ckpt` and a test image directory via `--data`. The `--show-output` option specifies the number of noisy/denoised/clean montages to display on screen. To disable this, simply remove `--show-output`.

```
python3 test.py \
  --data ../data \
  --load-ckpt ../ckpts/gaussian/n2n.pt \
  --noise-type gaussian \
  --noise-param 50 \
  --crop-size 256 \
  --show-output 3 \
  --cuda
```

See `python3 test.py --h` for list of optional arguments, or `examples/test.sh` for an example.

## Results

Gaussian model was trained for 100 epochs with a train/valid split of 2000/400. Text model was trained with 1000/200 due to the overhead introduced when corrupting with text. Both models were trained on an old NVIDIA GTX 780.


<table align="center">
  <tr align="center">
    <th colspan=9>Gaussian noise (σ = 25)</td>
  </tr>
  <tr align="center">
    <td colspan=2>Noisy input (20.34 dB)</td>
    <td colspan=2>Denoised (32.68 dB)</td>
    <td colspan=2>Clean targets (32.49 dB)</td>
    <td colspan=2>Ground truth</td>
  </tr>
  <tr align="center">
    <td colspan=2><img src="figures/monarch-gaussian-noisy.png"></td>
    <td colspan=2><img src="figures/monarch-gaussian-denoised.png"></td>
    <td colspan=2><img src="figures/monarch-gaussian-clean.png"></td>
    <td colspan=2><img src="figures/monarch.png"></td>
  </tr> 

  <tr align="center">
    <th colspan=9>Text overlay (<i>p</i> = 0.25)</td>
  </tr>
  <tr align="center">
    <td colspan=2>Noisy input (15.07 dB)</td>
    <td colspan=2>Denoised (28.10 dB)</td>
    <td colspan=2>Clean targets (27.79 dB)</td>
    <td colspan=2>Ground truth</td>
  </tr>
  <tr align="center">
    <td colspan=2><img src="figures/monarch-text-noisy.png"></td>
    <td colspan=2><img src="figures/monarch-text-denoised.png"></td>
    <td colspan=2><img src="figures/monarch-text-clean.png"></td>
    <td colspan=2><img src="figures/monarch.png"></td>
  </tr>  
</table>

## Known issues
- Activation functions should be LeakyReLUs everywhere except last layer where it should be ReLU. The current implementation (and pretrained models) assumes the opposite due to me originally misreading the paper. It was reported that using the correct version yields unstable training without batch norm; I haven't tested it yet.
- It is unclear how to deal with Poisson noise since it is data-dependent and thus nonadditive. See [official TensorFlow implementation](https://github.com/NVlabs/noise2noise) to adapt properly.

## References
* Jaakko Lehtinen, Jacob Munkberg, Jon Hasselgren, Samuli Laine, Tero Karras, Miika Aittala,and Timo Aila. [*Noise2Noise: Learning Image Restoration without Clean Data*](https://research.nvidia.com/publication/2018-07_Noise2Noise%3A-Learning-Image). Proceedings of the 35th International Conference on Machine Learning, 2018.

* Tsung-Yi Lin, Michael Maire, Serge Belongie, Lubomir Bourdev, Ross Girshick, James Hays, Pietro Perona, Deva Ramanan, C. Lawrence Zitnick, and Piotr Dollár. [*Microsoft COCO: Common Objects in Context*](https://arxiv.org/abs/1405.0312). arXiv:1405.0312, 2014.

## Acknowledgments

I would like to acknowledge [Yusuke Uchida](https://yu4u.github.io/) for his [Keras implementation of Noise2Noise](https://github.com/yu4u/noise2noise). Although Keras and PyTorch are very different frameworks, parts of his code did help me in completing this implementation.
