# Supplementary material
Source: ML conference proceedings conference paper supplement (https://www.ecva.net/papers/eccv_2020/papers_ECCV/html/123580443_ECCV_2020_paper.php)
Supplement: Supplementary file 3 [file 123580443-supp.zip › ECCV_2020_Supplementary/proposed/denoising/train/N2N_train/src/ceshi.py]

import torch
import torch.nn as nn
from torch.optim import Adam, lr_scheduler

from unet import UNet
from utils import *

import os
import json


model = UNet(in_channels=3)
model.load_state_dict(torch.load(ckpt_fname))
