# Supplementary material
Source: ML conference proceedings conference paper supplement (https://www.ecva.net/papers/eccv_2020/papers_ECCV/html/123580443_ECCV_2020_paper.php)
Supplement: Supplementary file 3 [file 123580443-supp.zip › ECCV_2020_Supplementary/proposed/denoising/train/N2N_train/src/cluster/train_text_noisy.sh]

python3 ../train.py \
  --train-dir ../../data/train_4200 --train-size 500 \
  --valid-dir ../../data/valid_800 --valid-size 100 \
  --ckpt-save-path ../../ckpts \
  --ckpt-overwrite \
  --report-interval 25 \
  --nb-epochs 50 \
  --loss l1 \
  --noise-type text \
  --noise-param 0.5 \
  --crop-size 128 \
  --plot-stats \
  --cuda
