# Supplementary material
Source: ML conference proceedings conference paper supplement (https://www.ecva.net/papers/eccv_2020/papers_ECCV/html/123580443_ECCV_2020_paper.php)
Supplement: Supplementary file 3 [file 123580443-supp.zip › ECCV_2020_Supplementary/proposed/denoising/train/N2N_train/src/examples/render.sh]

python3 ../render.py \
  --scene-path ../../data/scenes/bathroom/scene.json \
  --spp 8 \
  --nb-renders 4 \
  --resolution 512 512 \
  --output-dir ../../data/new_hdr \
  --hdr-targets
