# Supplementary material
Source: ML conference proceedings conference paper supplement (https://www.ecva.net/papers/eccv_2020/papers_ECCV/html/123580443_ECCV_2020_paper.php)
Supplement: Supplementary file 3 [file 123580443-supp.zip › ECCV_2020_Supplementary/proposed/denoising/train/N2N_train/src/examples/test.sh]

python3 ../test.py \
  --data ../../data/test \
  --load-ckpt ../../ckpts/gaussian/n2n-gaussian.pt \
  --noise-type gaussian \
  --noise-param 50 \
  --seed 1 \
  --crop-size 512 \
  --show-output 2
