# Supplementary material
Source: ML conference proceedings conference paper supplement (https://www.ecva.net/papers/eccv_2020/papers_ECCV/html/123580443_ECCV_2020_paper.php)
Supplement: Supplementary file 3 [file 123580443-supp.zip › ECCV_2020_Supplementary/proposed/denoising/train/N2N_train/src/unet.py]

#!/usr/bin/env python3
# -*- coding: utf-8 -*-

import torch
import torch.nn as nn
import torch.nn.functional as F

class UNet(nn.Module):
    """Custom U-Net architecture for Noise2Noise (see Appendix, Table 2)."""

    def __init__(self, in_channels=3, out_channels=3):
        """Initializes U-Net."""

        super(UNet, self).__init__()

        # Layers: enc_conv0, enc_conv1, pool1
        self._block1 = nn.Sequential(
            nn.Conv2d(in_channels, 48, 3, stride=1, padding=1),
            nn.ReLU(inplace=True),
            nn.Conv2d(48, 48, 3, padding=1),
            nn.ReLU(inplace=True),
            nn.MaxPool2d(2))

        # Layers: enc_conv(i), pool(i); i=2..5
        self._block2 = nn.Sequential(
            nn.Conv2d(48, 48, 3, stride=1, padding=1),
            nn.ReLU(inplace=True),
            nn.MaxPool2d(2))

        # Layers: enc_conv6, upsample5
        self._block3 = nn.Sequential(
            nn.Conv2d(48, 48, 3, stride=1, padding=1),
            nn.ReLU(inplace=True),
            nn.ConvTranspose2d(48, 48, 3, stride=2, padding=1, output_padding=1))
            #nn.Upsample(scale_factor=2, mode='nearest'))

        # Layers: dec_conv5a, dec_conv5b, upsample4
        self._block4 = nn.Sequential(
            nn.Conv2d(96, 96, 3, stride=1, padding=1),
            nn.ReLU(inplace=True),
            nn.Conv2d(96, 96, 3, stride=1, padding=1),
            nn.ReLU(inplace=True),
            nn.ConvTranspose2d(96, 96, 3, stride=2, padding=1, output_padding=1))
            #nn.Upsample(scale_factor=2, mode='nearest'))

        # Layers: dec_deconv(i)a, dec_deconv(i)b, upsample(i-1); i=4..2
        self._block5 = nn.Sequential(
            nn.Conv2d(144, 96, 3, stride=1, padding=1),
            nn.ReLU(inplace=True),
            nn.Conv2d(96, 96, 3, stride=1, padding=1),
            nn.ReLU(inplace=True),
            nn.ConvTranspose2d(96, 96, 3, stride=2, padding=1, output_padding=1))
            #nn.Upsample(scale_factor=2, mode='nearest'))

        # Layers: dec_conv1a, dec_conv1b, dec_conv1c,
        self._block6 = nn.Sequential(
            nn.Conv2d(96 + in_channels, 64, 3, stride=1, padding=1),
            nn.ReLU(inplace=True),
            nn.Conv2d(64, 32, 3, stride=1, padding=1),
            nn.ReLU(inplace=True),
            nn.Conv2d(32, out_channels, 3, stride=1, padding=1),
            nn.LeakyReLU(0.1))

        # Initialize weights
        self._init_weights()


    def _init_weights(self):
        """Initializes weights using He et al. (2015)."""

        for m in self.modules():
            if isinstance(m, nn.ConvTranspose2d) or isinstance(m, nn.Conv2d):
                nn.init.kaiming_normal_(m.weight.data)
                m.bias.data.zero_()


    def forward(self, x):
        """Through encoder, then decoder by adding U-skip connections. """

        # Encoder
        pool1 = self._block1(x)
        pool2 = self._block2(pool1)
        pool3 = self._block2(pool2)
        pool4 = self._block2(pool3)
        pool5 = self._block2(pool4)

        # Decoder
        upsample5 = self._block3(pool5)
        #_,_,H5,W5 = pool4.size()
        #upsample5 = F.upsample(upsample5,size=(H5,W5),mode='bilinear')
        concat5 = torch.cat((upsample5, pool4), dim=1)
        upsample4 = self._block4(concat5)
        #_,_,H4,W4 = pool3.size()
        #upsample4 = F.upsample(upsample4,size=(H4,W4),mode='bilinear')
        concat4 = torch.cat((upsample4, pool3), dim=1)
        upsample3 = self._block5(concat4)
        #_,_,H3,W3 = pool2.size()
        #upsample3 = F.upsample(upsample3,size=(H3,W3),mode='bilinear')
        concat3 = torch.cat((upsample3, pool2), dim=1)
        upsample2 = self._block5(concat3)
        #_,_,H2,W2 = pool1.size()
        #upsample2 = F.upsample(upsample2,size=(H2,W2),mode='bilinear')
        concat2 = torch.cat((upsample2, pool1), dim=1)
        upsample1 = self._block5(concat2)
        
        _,_,H1,W1 = x.size()
        upsample1 = F.upsample(upsample1,size=(H1,W1),mode='bilinear')
        concat1 = torch.cat((upsample1, x), dim=1)

        # Final activation
        return self._block6(concat1)
