# Supplementary material
Source: ML conference proceedings conference paper supplement (https://www.ecva.net/papers/eccv_2020/papers_ECCV/html/123580443_ECCV_2020_paper.php)
Supplement: Supplementary file 3 [file 123580443-supp.zip › ECCV_2020_Supplementary/proposed/denoising/train/VDNet/datasets/data_tools.py]

#!/usr/bin/env python
# -*- coding:utf-8 -*-
# Power by Zongsheng Yue 2019-09-02 15:11:05

import cv2
import numpy as np
import random

def data_augmentation(image, mode):
    '''
    Performs dat augmentation of the input image
    Input:
        image: a cv2 (OpenCV) image
        mode: int. Choice of transformation to apply to the image
                0 - no transformation
                1 - flip up and down
                2 - rotate counterwise 90 degree
                3 - rotate 90 degree and flip up and down
                4 - rotate 180 degree
                5 - rotate 180 degree and flip
                6 - rotate 270 degree
                7 - rotate 270 degree and flip
    '''
    if mode == 0:
        # original
        pass
    elif mode == 1:
        # flip up and down
        out = np.flipud(image)
    elif mode == 2:
        # rotate counterwise 90 degree
        out = np.rot90(image)
    elif mode == 3:
        # rotate 90 degree and flip up and down
        out = np.rot90(image)
        out = np.flipud(out)
    elif mode == 4:
        # rotate 180 degree
        out = np.rot90(image, k=2)
    elif mode == 5:
        # rotate 180 degree and flip
        out = np.rot90(image, k=2)
        out = np.flipud(out)
    elif mode == 6:
        # rotate 270 degree
        out = np.rot90(image, k=3)
    elif mode == 7:
        # rotate 270 degree and flip
        out = np.rot90(image, k=3)
        out = np.flipud(out)
    else:
        raise Exception('Invalid choice of image transformation')

    return out

def sigma_estimate(im_noisy, im_gt, win, sigma_spatial):
    noise2 = (im_noisy-im_gt)**2
    sigma2_map_est = cv2.GaussianBlur(noise2, (win, win), sigma_spatial)
    sigma2_map_est = sigma2_map_est.astype(np.float32)
    sigma2_map_est = np.where(sigma2_map_est<1e-10, 1e-10, sigma2_map_est)
    if sigma2_map_est.ndim == 2:
        sigma2_map_est = sigma2_map_est[:, :, np.newaxis]
    return sigma2_map_est

def random_augmentation(*args):
    out = []
    if random.randint(0,1) == 1:
        flag_aug = random.randint(1,7)
        for data in args:
            out.append(data_augmentation(data, flag_aug).copy())
    else:
        for data in args:
            out.append(data)
    return out

def gaussian_kernel(H, W, center, scale):
    centerH = center[0]
    centerW = center[1]
    XX, YY = np.meshgrid(np.arange(W), np.arange(H))
    ZZ = 1./(2*np.pi*scale**2) * np.exp( (-(XX-centerH)**2-(YY-centerW)**2)/(2*scale**2) )
    return ZZ
