# Supplementary material
Source: ML conference proceedings conference paper supplement (https://www.ecva.net/papers/eccv_2020/papers_ECCV/html/123580443_ECCV_2020_paper.php)
Supplement: Supplementary file 3 [file 123580443-supp.zip › ECCV_2020_Supplementary/proposed/denoising/train/VDNet/datasets/prepare_data/SIDD/big2small_test.py]

#!/usr/bin/env python
# -*- coding:utf-8 -*-
# Power by Zongsheng Yue 2019-01-18 10:26:59

import os
import numpy as np
import h5py as h5
from scipy.io import loadmat
import argparse

parser = argparse.ArgumentParser(prog='SIDD Test dataset Generation')
# The validation set of SIDD: ValidationNoisyBlocksSrgb.mat, ValidationGtBlocksSrgb.mat
parser.add_argument('--data_dir', default=None, type=str, metavar='PATH',
                                    help="path to save the validation set of SIDD, (default: None)")
args = parser.parse_args()

print('Validation: Saving the noisy blocks to hdf5 format!')
path_h5 = os.path.join(args.data_dir, 'small_imgs_test.hdf5')
if os.path.exists(path_h5):
    os.remove(path_h5)
val_data_dict = loadmat(os.path.join(args.data_dir, 'ValidationNoisyBlocksSrgb.mat'))
val_data_noisy = val_data_dict['ValidationNoisyBlocksSrgb']
val_data_dict = loadmat(os.path.join(args.data_dir, 'ValidationGtBlocksSrgb.mat'))
val_data_gt = val_data_dict['ValidationGtBlocksSrgb']
num_img, num_block, _, _, _ = val_data_gt.shape
num_patch = 0
with h5.File(path_h5, 'w') as h5_file:
    for ii in range(num_img):
        for jj in range(num_block):
            if (num_patch+1) % 100 == 0:
                print('    The {:d} images'.format(num_patch+1))
            im_noisy = val_data_noisy[ii, jj, ]
            im_gt = val_data_gt[ii, jj, ]
            imgs = np.concatenate((im_noisy, im_gt), axis=2)
            h5_file.create_dataset(name=str(num_patch), shape=imgs.shape, dtype=imgs.dtype, data=imgs)
            num_patch += 1
print('Finish!\n')
