# Supplementary material
Source: ML conference proceedings conference paper supplement (https://www.ecva.net/papers/eccv_2020/papers_ECCV/html/123580443_ECCV_2020_paper.php)
Supplement: Supplementary file 3 [file 123580443-supp.zip › ECCV_2020_Supplementary/proposed/denoising/train/VDNet/datasets/prepare_data/SIDD/big2small_train.py]

#!/usr/bin/env python
# -*- coding:utf-8 -*-
# Power by Zongsheng Yue 2019-01-18 10:26:59

import os
from glob import glob
import cv2
import numpy as np
import h5py as h5
import argparse

parser = argparse.ArgumentParser(prog='SIDD Train dataset Generation')
# The orignal SIDD images: /ssd1t/SIDD/
parser.add_argument('--data_dir', default=None, type=str, metavar='PATH',
                                      help="path to save the training set of SIDD, (default: None)")
args = parser.parse_args()

path_all_noisy = glob(os.path.join(args.data_dir, '**/*NOISY*.PNG'), recursive=True)
path_all_noisy = sorted(path_all_noisy)
path_all_gt = [x.replace('NOISY', 'GT') for x in path_all_noisy]
print('Number of big images: {:d}'.format(len(path_all_gt)))

print('Training: Split the original images to small ones!')
path_h5 = os.path.join(args.data_dir, 'small_imgs_train.hdf5')
if os.path.exists(path_h5):
    os.remove(path_h5)
pch_size = 512
stride = 512-128
num_patch = 0
C = 3
with h5.File(path_h5, 'w') as h5_file:
    for ii in range(len(path_all_gt)):
        if (ii+1) % 10 == 0:
            print('    The {:d} original images'.format(ii+1))
        im_noisy_int8 = cv2.imread(path_all_noisy[ii])[:, :, ::-1]
        H, W, _ = im_noisy_int8.shape
        im_gt_int8 = cv2.imread(path_all_gt[ii])[:, :, ::-1]
        ind_H = list(range(0, H-pch_size+1, stride))
        if ind_H[-1] < H-pch_size:
            ind_H.append(H-pch_size)
        ind_W = list(range(0, W-pch_size+1, stride))
        if ind_W[-1] < W-pch_size:
            ind_W.append(W-pch_size)
        for start_H in ind_H:
            for start_W in ind_W:
                pch_noisy = im_noisy_int8[start_H:start_H+pch_size, start_W:start_W+pch_size, ]
                pch_gt = im_gt_int8[start_H:start_H+pch_size, start_W:start_W+pch_size, ]
                pch_imgs = np.concatenate((pch_noisy, pch_gt), axis=2)
                h5_file.create_dataset(name=str(num_patch), shape=pch_imgs.shape,
                                                                dtype=pch_imgs.dtype, data=pch_imgs)
                num_patch += 1
print('Total {:d} small images in training set'.format(num_patch))
print('Finish!\n')
