# Supplementary material
Source: ML conference proceedings conference paper supplement (https://www.ecva.net/papers/eccv_2020/papers_ECCV/html/123580443_ECCV_2020_paper.php)

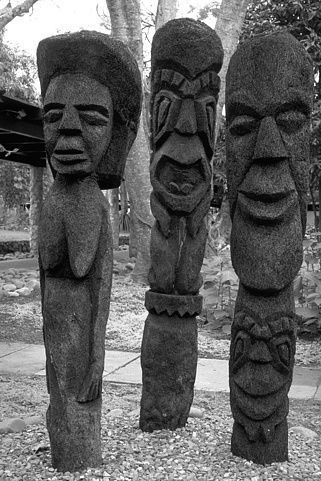

Supplement: Supplementary file 3 [file 123580443-supp.zip › ECCV_2020_Supplementary/proposed/denoising/framework/data/BSD68/test001.png]

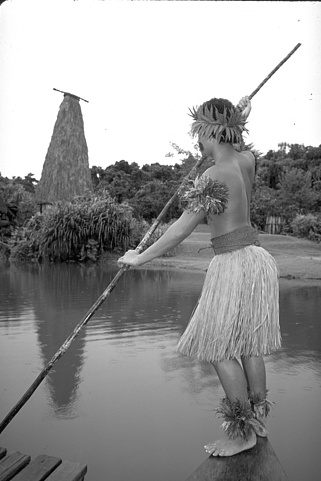

Supplement: Supplementary file 3 [file 123580443-supp.zip › ECCV_2020_Supplementary/proposed/denoising/framework/data/BSD68/test002.png]

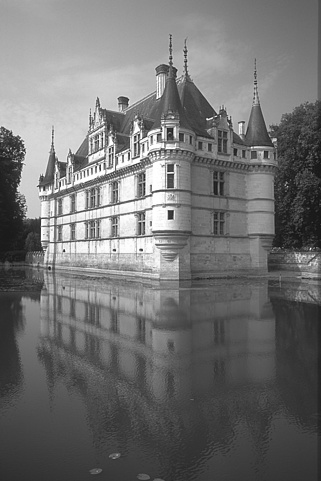

Supplement: Supplementary file 3 [file 123580443-supp.zip › ECCV_2020_Supplementary/proposed/denoising/framework/data/BSD68/test003.png]

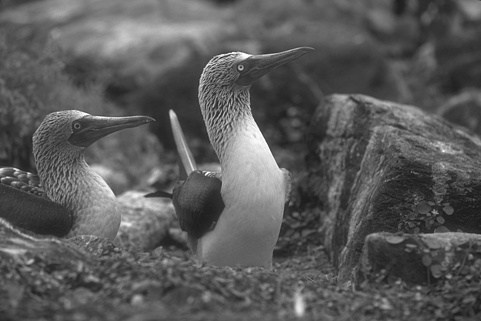

Supplement: Supplementary file 3 [file 123580443-supp.zip › ECCV_2020_Supplementary/proposed/denoising/framework/data/BSD68/test004.png]

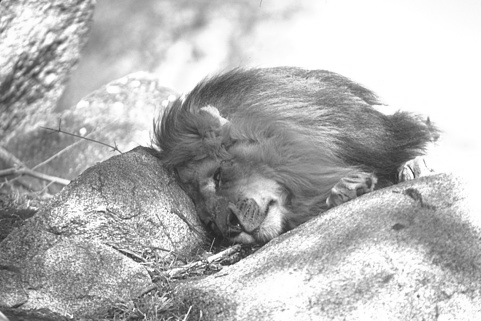

Supplement: Supplementary file 3 [file 123580443-supp.zip › ECCV_2020_Supplementary/proposed/denoising/framework/data/BSD68/test005.png]

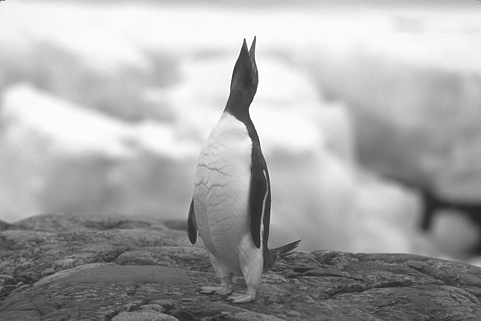

Supplement: Supplementary file 3 [file 123580443-supp.zip › ECCV_2020_Supplementary/proposed/denoising/framework/data/BSD68/test006.png]

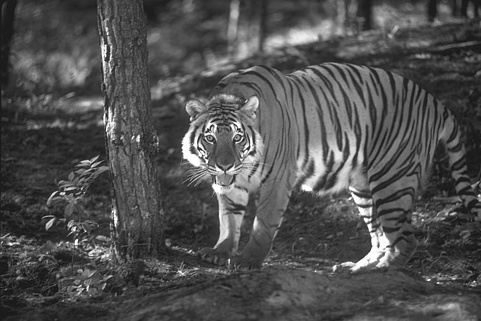

Supplement: Supplementary file 3 [file 123580443-supp.zip › ECCV_2020_Supplementary/proposed/denoising/framework/data/BSD68/test007.png]

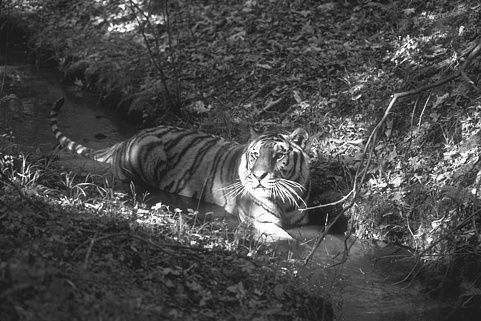

Supplement: Supplementary file 3 [file 123580443-supp.zip › ECCV_2020_Supplementary/proposed/denoising/framework/data/BSD68/test008.png]

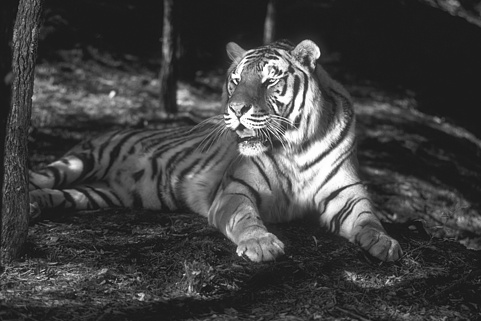

Supplement: Supplementary file 3 [file 123580443-supp.zip › ECCV_2020_Supplementary/proposed/denoising/framework/data/BSD68/test009.png]

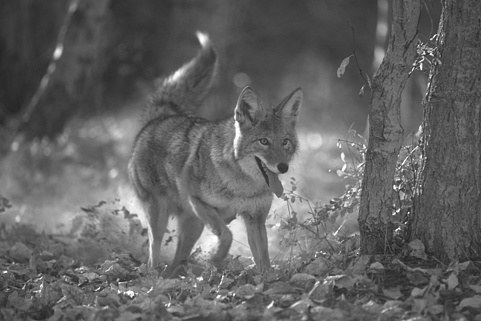

Supplement: Supplementary file 3 [file 123580443-supp.zip › ECCV_2020_Supplementary/proposed/denoising/framework/data/BSD68/test010.png]

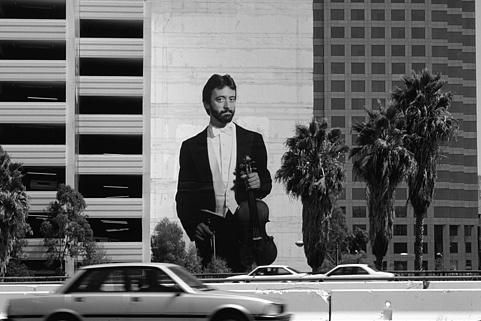

Supplement: Supplementary file 3 [file 123580443-supp.zip › ECCV_2020_Supplementary/proposed/denoising/framework/data/BSD68/test011.png]

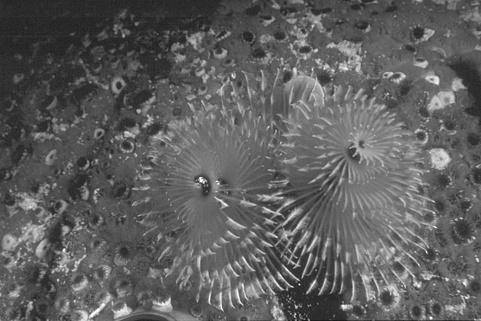

Supplement: Supplementary file 3 [file 123580443-supp.zip › ECCV_2020_Supplementary/proposed/denoising/framework/data/BSD68/test012.png]

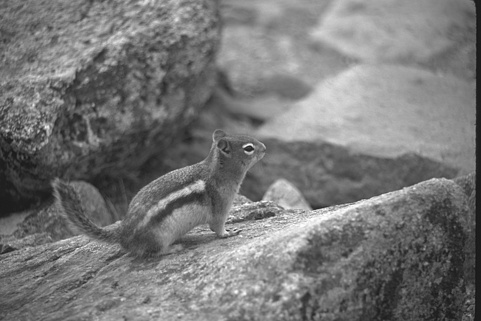

Supplement: Supplementary file 3 [file 123580443-supp.zip › ECCV_2020_Supplementary/proposed/denoising/framework/data/BSD68/test013.png]

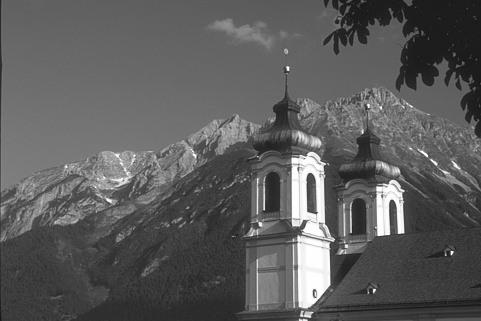

Supplement: Supplementary file 3 [file 123580443-supp.zip › ECCV_2020_Supplementary/proposed/denoising/framework/data/BSD68/test014.png]

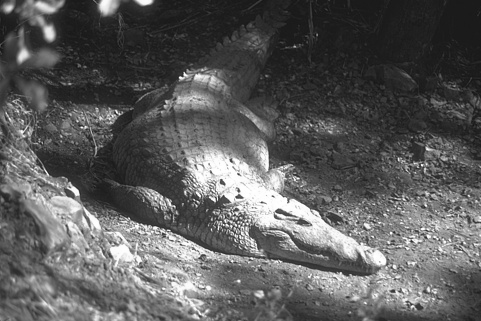

Supplement: Supplementary file 3 [file 123580443-supp.zip › ECCV_2020_Supplementary/proposed/denoising/framework/data/BSD68/test015.png]

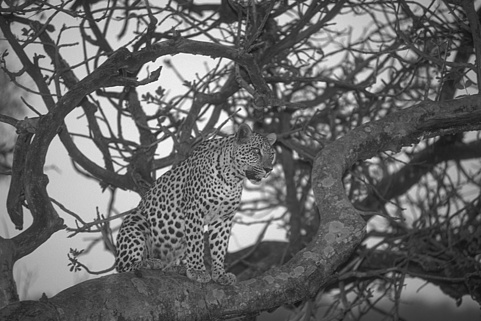

Supplement: Supplementary file 3 [file 123580443-supp.zip › ECCV_2020_Supplementary/proposed/denoising/framework/data/BSD68/test016.png]

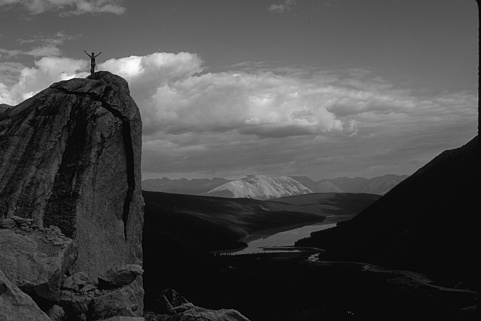

Supplement: Supplementary file 3 [file 123580443-supp.zip › ECCV_2020_Supplementary/proposed/denoising/framework/data/BSD68/test017.png]

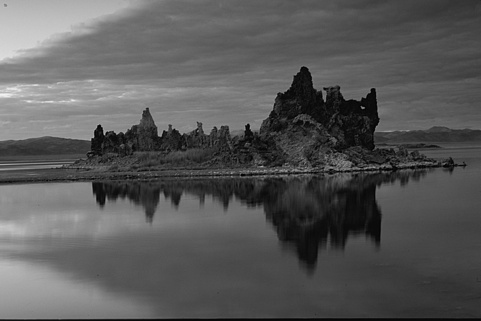

Supplement: Supplementary file 3 [file 123580443-supp.zip › ECCV_2020_Supplementary/proposed/denoising/framework/data/BSD68/test018.png]

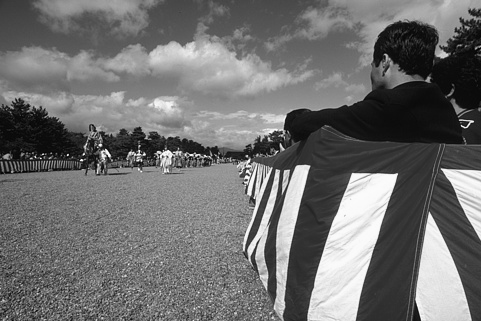

Supplement: Supplementary file 3 [file 123580443-supp.zip › ECCV_2020_Supplementary/proposed/denoising/framework/data/BSD68/test019.png]

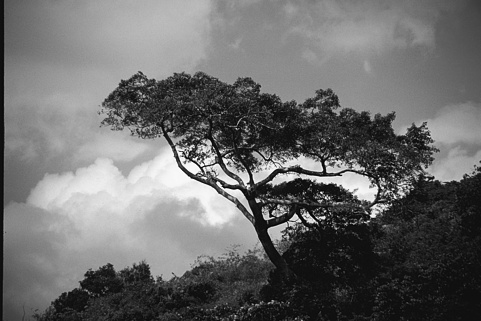

Supplement: Supplementary file 3 [file 123580443-supp.zip › ECCV_2020_Supplementary/proposed/denoising/framework/data/BSD68/test020.png]

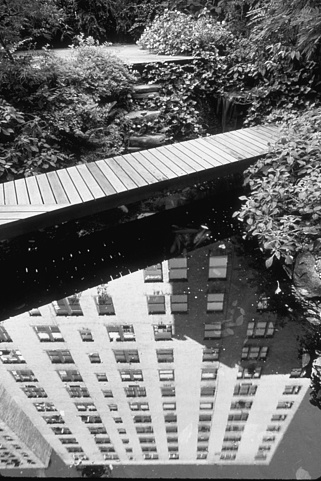

Supplement: Supplementary file 3 [file 123580443-supp.zip › ECCV_2020_Supplementary/proposed/denoising/framework/data/BSD68/test021.png]

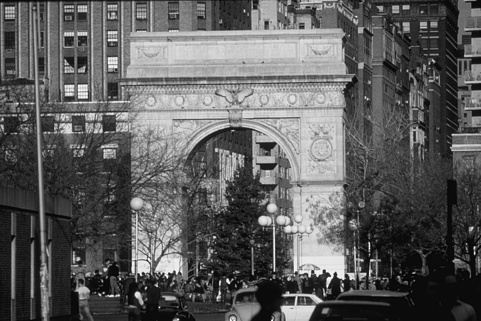

Supplement: Supplementary file 3 [file 123580443-supp.zip › ECCV_2020_Supplementary/proposed/denoising/framework/data/BSD68/test022.png]

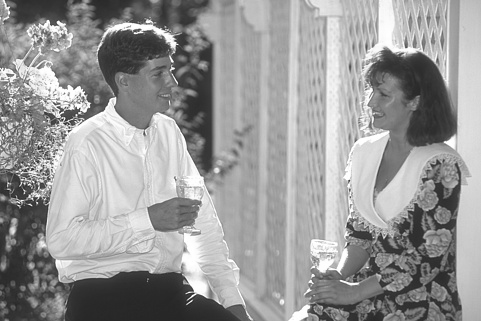

Supplement: Supplementary file 3 [file 123580443-supp.zip › ECCV_2020_Supplementary/proposed/denoising/framework/data/BSD68/test023.png]

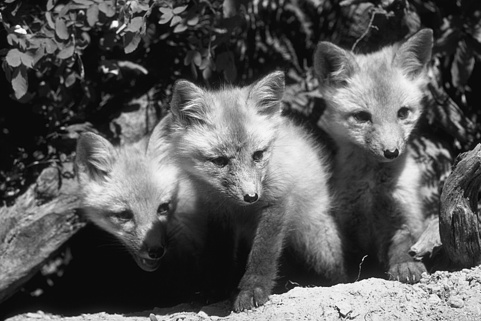

Supplement: Supplementary file 3 [file 123580443-supp.zip › ECCV_2020_Supplementary/proposed/denoising/framework/data/BSD68/test024.png]

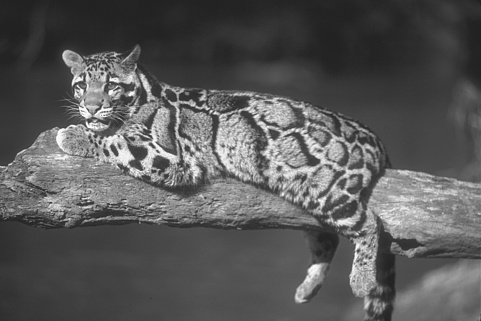

Supplement: Supplementary file 3 [file 123580443-supp.zip › ECCV_2020_Supplementary/proposed/denoising/framework/data/BSD68/test025.png]

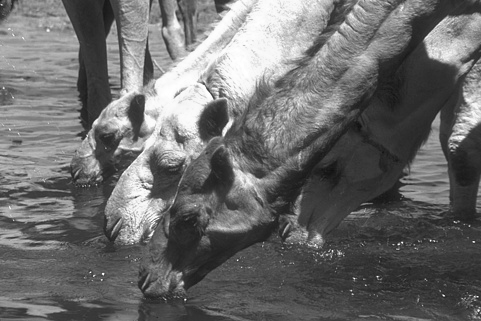

Supplement: Supplementary file 3 [file 123580443-supp.zip › ECCV_2020_Supplementary/proposed/denoising/framework/data/BSD68/test026.png]

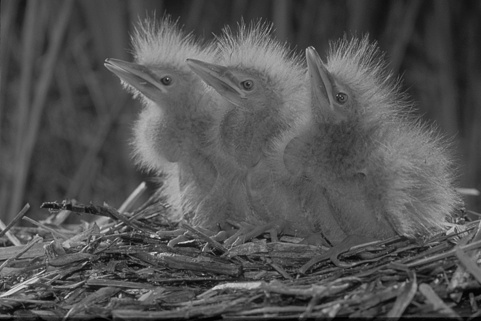

Supplement: Supplementary file 3 [file 123580443-supp.zip › ECCV_2020_Supplementary/proposed/denoising/framework/data/BSD68/test027.png]

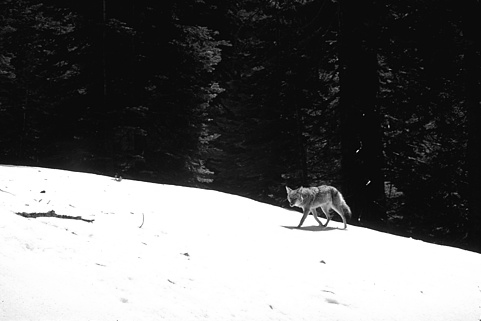

Supplement: Supplementary file 3 [file 123580443-supp.zip › ECCV_2020_Supplementary/proposed/denoising/framework/data/BSD68/test028.png]

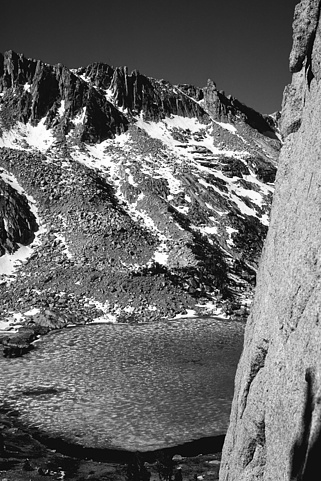

Supplement: Supplementary file 3 [file 123580443-supp.zip › ECCV_2020_Supplementary/proposed/denoising/framework/data/BSD68/test029.png]

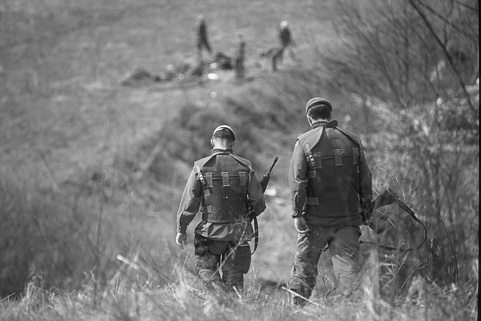

Supplement: Supplementary file 3 [file 123580443-supp.zip › ECCV_2020_Supplementary/proposed/denoising/framework/data/BSD68/test030.png]

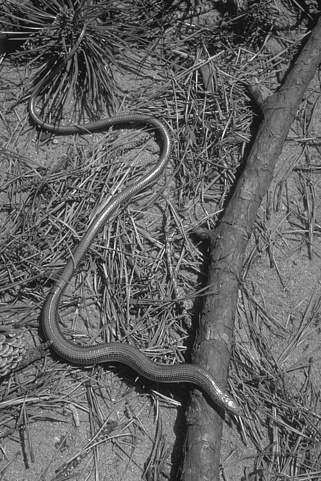

Supplement: Supplementary file 3 [file 123580443-supp.zip › ECCV_2020_Supplementary/proposed/denoising/framework/data/BSD68/test031.png]

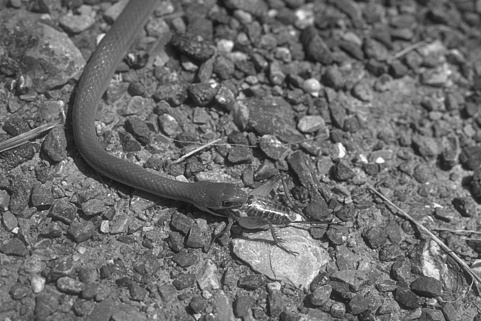

Supplement: Supplementary file 3 [file 123580443-supp.zip › ECCV_2020_Supplementary/proposed/denoising/framework/data/BSD68/test032.png]

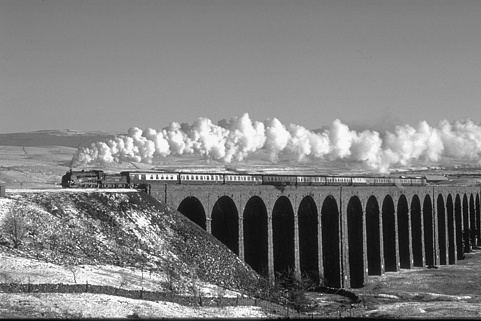

Supplement: Supplementary file 3 [file 123580443-supp.zip › ECCV_2020_Supplementary/proposed/denoising/framework/data/BSD68/test033.png]

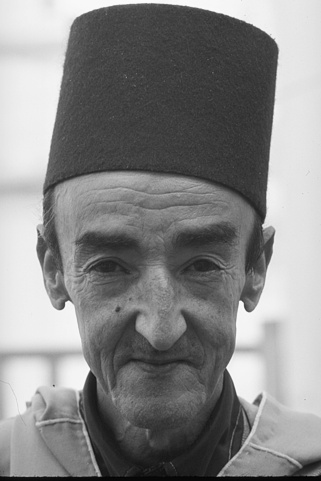

Supplement: Supplementary file 3 [file 123580443-supp.zip › ECCV_2020_Supplementary/proposed/denoising/framework/data/BSD68/test034.png]

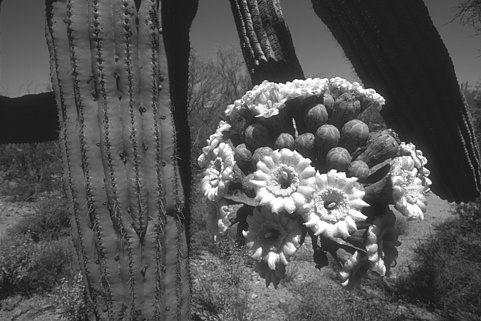

Supplement: Supplementary file 3 [file 123580443-supp.zip › ECCV_2020_Supplementary/proposed/denoising/framework/data/BSD68/test035.png]

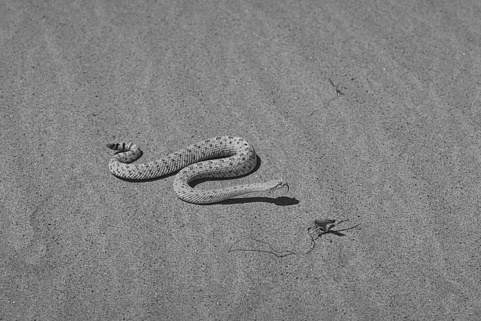

Supplement: Supplementary file 3 [file 123580443-supp.zip › ECCV_2020_Supplementary/proposed/denoising/framework/data/BSD68/test036.png]

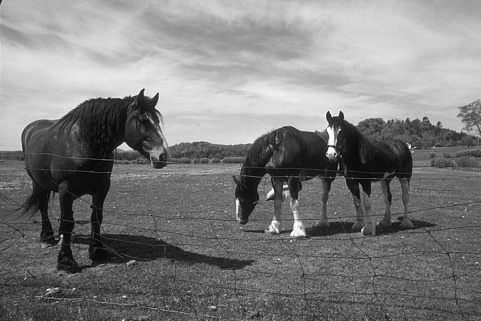

Supplement: Supplementary file 3 [file 123580443-supp.zip › ECCV_2020_Supplementary/proposed/denoising/framework/data/BSD68/test037.png]

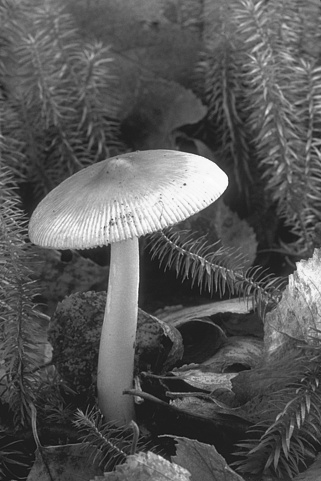

Supplement: Supplementary file 3 [file 123580443-supp.zip › ECCV_2020_Supplementary/proposed/denoising/framework/data/BSD68/test038.png]

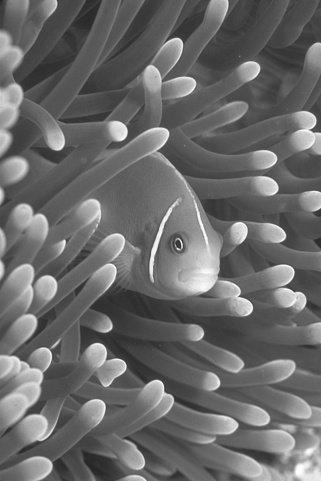

Supplement: Supplementary file 3 [file 123580443-supp.zip › ECCV_2020_Supplementary/proposed/denoising/framework/data/BSD68/test039.png]

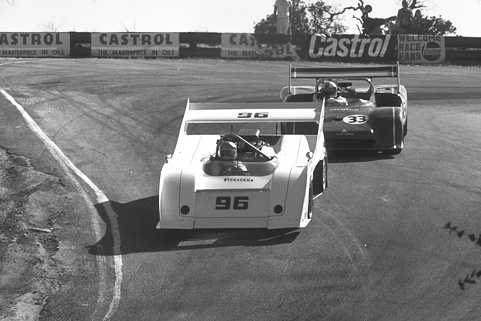

Supplement: Supplementary file 3 [file 123580443-supp.zip › ECCV_2020_Supplementary/proposed/denoising/framework/data/BSD68/test040.png]

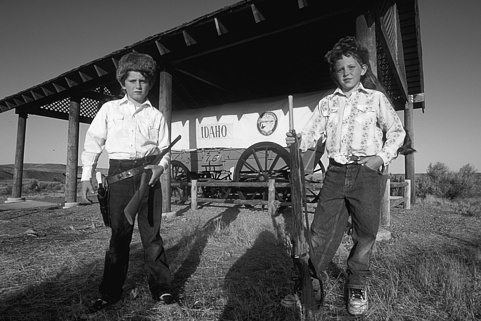

Supplement: Supplementary file 3 [file 123580443-supp.zip › ECCV_2020_Supplementary/proposed/denoising/framework/data/BSD68/test041.png]

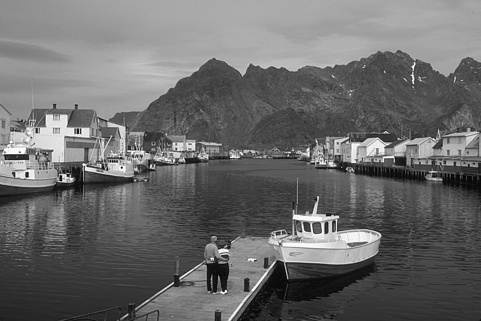

Supplement: Supplementary file 3 [file 123580443-supp.zip › ECCV_2020_Supplementary/proposed/denoising/framework/data/BSD68/test042.png]

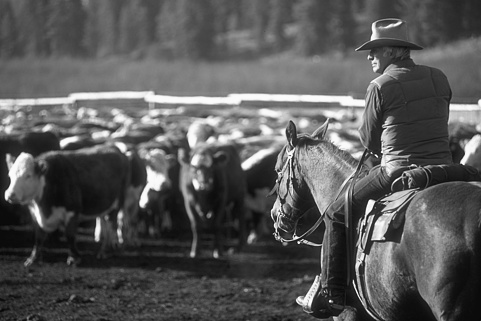

Supplement: Supplementary file 3 [file 123580443-supp.zip › ECCV_2020_Supplementary/proposed/denoising/framework/data/BSD68/test043.png]

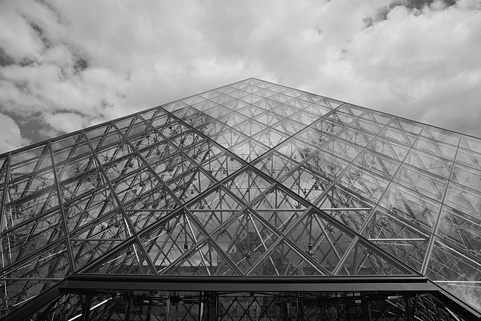

Supplement: Supplementary file 3 [file 123580443-supp.zip › ECCV_2020_Supplementary/proposed/denoising/framework/data/BSD68/test044.png]

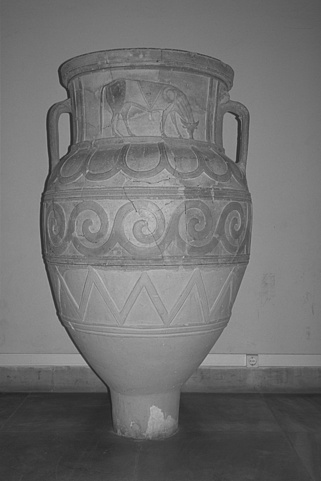

Supplement: Supplementary file 3 [file 123580443-supp.zip › ECCV_2020_Supplementary/proposed/denoising/framework/data/BSD68/test045.png]

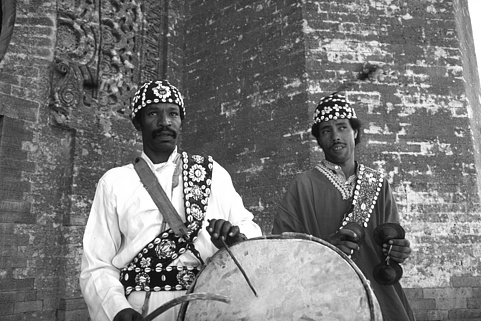

Supplement: Supplementary file 3 [file 123580443-supp.zip › ECCV_2020_Supplementary/proposed/denoising/framework/data/BSD68/test046.png]

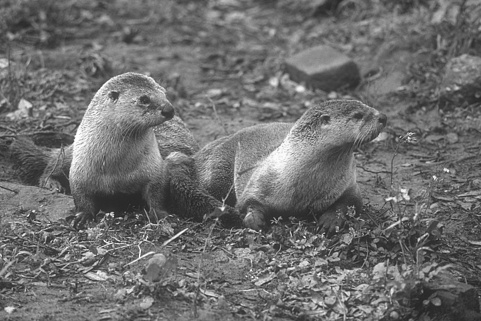

Supplement: Supplementary file 3 [file 123580443-supp.zip › ECCV_2020_Supplementary/proposed/denoising/framework/data/BSD68/test047.png]

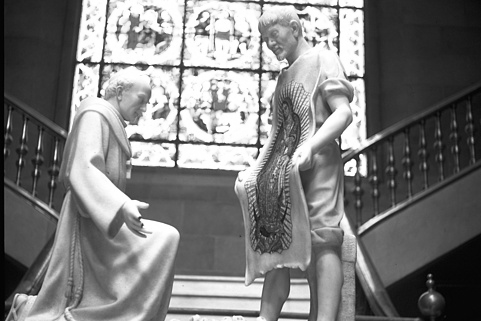

Supplement: Supplementary file 3 [file 123580443-supp.zip › ECCV_2020_Supplementary/proposed/denoising/framework/data/BSD68/test048.png]

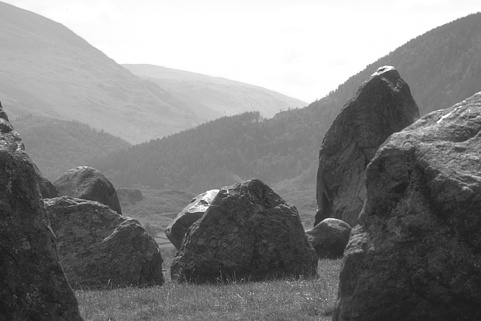

Supplement: Supplementary file 3 [file 123580443-supp.zip › ECCV_2020_Supplementary/proposed/denoising/framework/data/BSD68/test049.png]

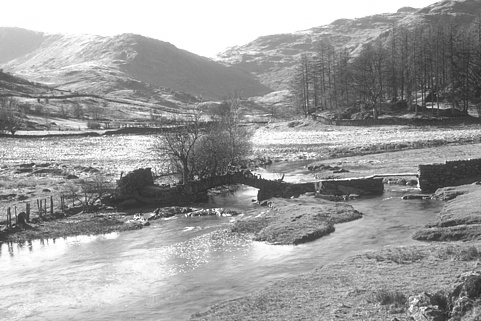

Supplement: Supplementary file 3 [file 123580443-supp.zip › ECCV_2020_Supplementary/proposed/denoising/framework/data/BSD68/test050.png]

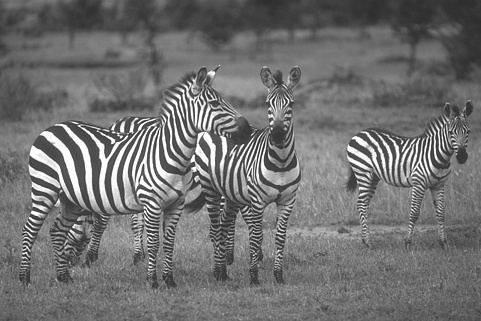

Supplement: Supplementary file 3 [file 123580443-supp.zip › ECCV_2020_Supplementary/proposed/denoising/framework/data/BSD68/test051.png]

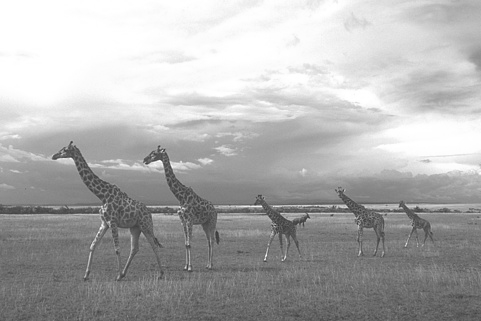

Supplement: Supplementary file 3 [file 123580443-supp.zip › ECCV_2020_Supplementary/proposed/denoising/framework/data/BSD68/test052.png]

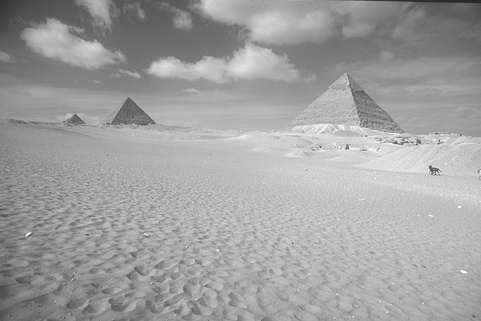

Supplement: Supplementary file 3 [file 123580443-supp.zip › ECCV_2020_Supplementary/proposed/denoising/framework/data/BSD68/test053.png]

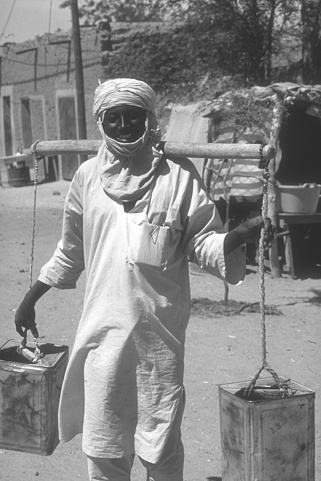

Supplement: Supplementary file 3 [file 123580443-supp.zip › ECCV_2020_Supplementary/proposed/denoising/framework/data/BSD68/test054.png]

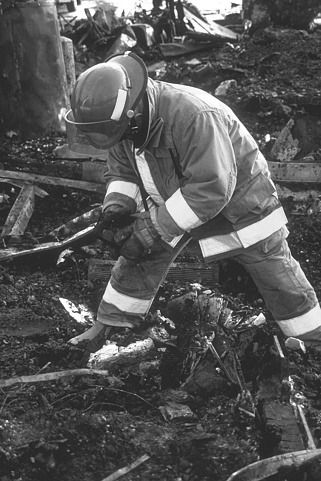

Supplement: Supplementary file 3 [file 123580443-supp.zip › ECCV_2020_Supplementary/proposed/denoising/framework/data/BSD68/test055.png]

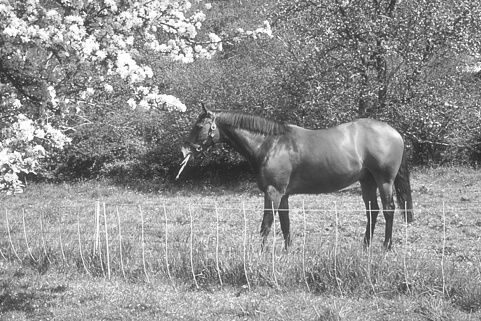

Supplement: Supplementary file 3 [file 123580443-supp.zip › ECCV_2020_Supplementary/proposed/denoising/framework/data/BSD68/test056.png]

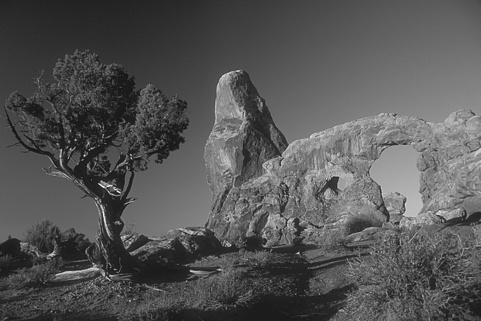

Supplement: Supplementary file 3 [file 123580443-supp.zip › ECCV_2020_Supplementary/proposed/denoising/framework/data/BSD68/test057.png]

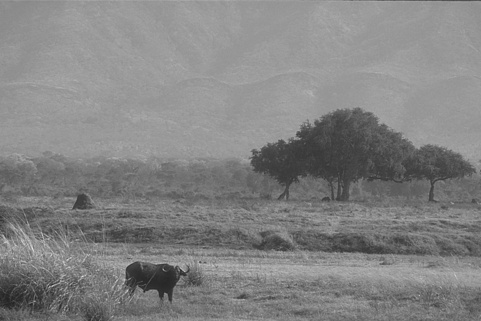

Supplement: Supplementary file 3 [file 123580443-supp.zip › ECCV_2020_Supplementary/proposed/denoising/framework/data/BSD68/test058.png]

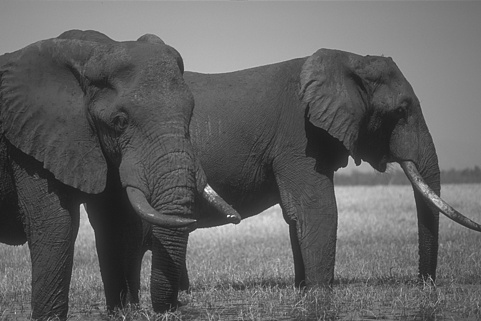

Supplement: Supplementary file 3 [file 123580443-supp.zip › ECCV_2020_Supplementary/proposed/denoising/framework/data/BSD68/test059.png]

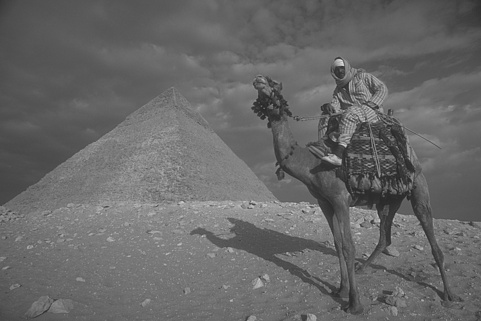

Supplement: Supplementary file 3 [file 123580443-supp.zip › ECCV_2020_Supplementary/proposed/denoising/framework/data/BSD68/test060.png]

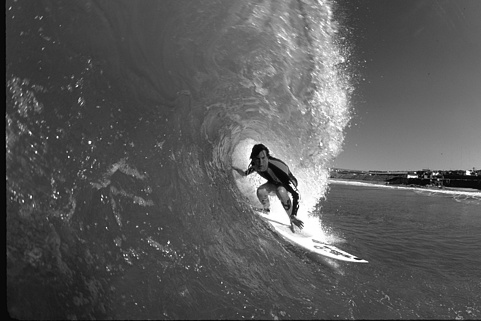

Supplement: Supplementary file 3 [file 123580443-supp.zip › ECCV_2020_Supplementary/proposed/denoising/framework/data/BSD68/test061.png]

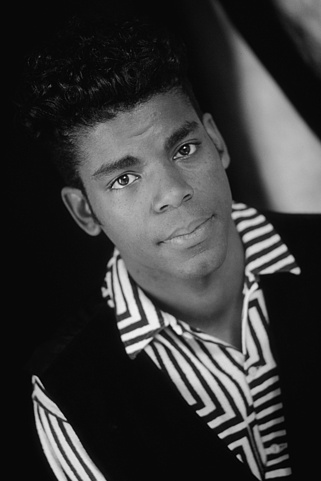

Supplement: Supplementary file 3 [file 123580443-supp.zip › ECCV_2020_Supplementary/proposed/denoising/framework/data/BSD68/test062.png]

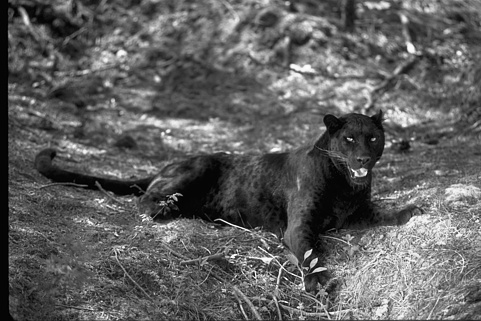

Supplement: Supplementary file 3 [file 123580443-supp.zip › ECCV_2020_Supplementary/proposed/denoising/framework/data/BSD68/test063.png]

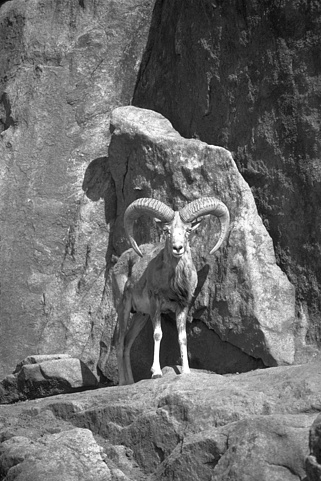

Supplement: Supplementary file 3 [file 123580443-supp.zip › ECCV_2020_Supplementary/proposed/denoising/framework/data/BSD68/test064.png]

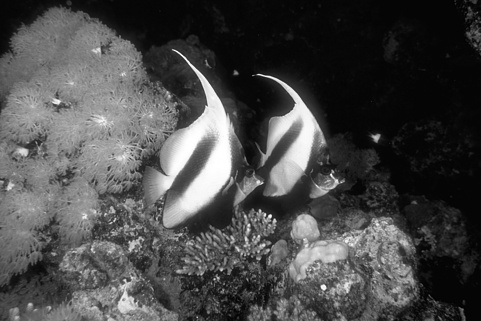

Supplement: Supplementary file 3 [file 123580443-supp.zip › ECCV_2020_Supplementary/proposed/denoising/framework/data/BSD68/test065.png]

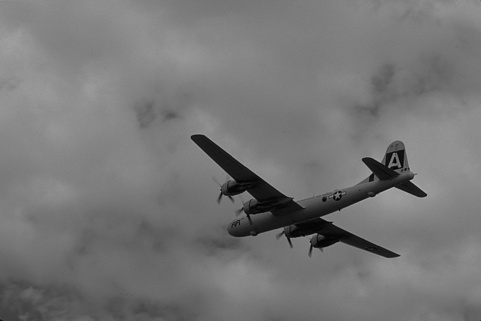

Supplement: Supplementary file 3 [file 123580443-supp.zip › ECCV_2020_Supplementary/proposed/denoising/framework/data/BSD68/test066.png]

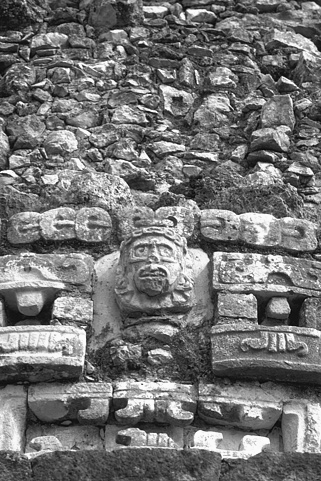

Supplement: Supplementary file 3 [file 123580443-supp.zip › ECCV_2020_Supplementary/proposed/denoising/framework/data/BSD68/test067.png]

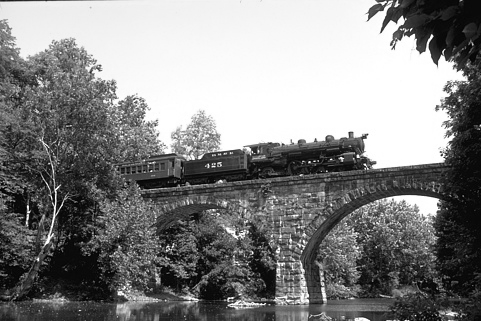

Supplement: Supplementary file 3 [file 123580443-supp.zip › ECCV_2020_Supplementary/proposed/denoising/framework/data/BSD68/test068.png]
